# Supplementary material
Source: publisher figshare collection journal article supplement (https://acs.figshare.com/ndownloader/files/23582933)
Supplement: Supplementary file 1 [file 23582933]

# Organocatalytic Ring-Opening Polymerization toward Poly( $\gamma$ -amide- $\epsilon$ -caprolactone)s with Tunable LCSTs

## Supporting Information

Lianlei Wen<sup>[†][1]</sup>, Shaoze Zhang<sup>[†][2]</sup>, Yan Xiao<sup>\*[1]</sup>, Jin He<sup>[1]</sup>, Shuang Zhu<sup>[1]</sup>, Jun Zhang<sup>[1]</sup>, Zihan Wu<sup>[1]</sup>, Meidong Lang<sup>\*[1]</sup>

[1] Shanghai Key Laboratory of Advanced Polymeric Materials, Key Laboratory for Ultrafine Materials of Ministry of Education, School of Materials Science and Engineering, East China University of Science and Technology (China)

[2] National Engineering Laboratory for Vacuum Metallurgy, Engineering Laboratory for Advanced Battery and Materials of Yunnan Province, Kunming University of Science and Technology (China)

[†] These authors contributed equally.

### Table of Contents

|                                                                                       |     |
|---------------------------------------------------------------------------------------|-----|
| 1 Experimental detail                                                                 | S2  |
| 1.1 Materials                                                                         | S2  |
| 1.2 Instruments and measurements                                                      | S2  |
| 1.3 Procedure of monomer preparation                                                  | S3  |
| 1.4 General procedure for homo-polymerization                                         | S8  |
| 1.5 Kinetics of Polymerization                                                        | S10 |
| 1.6 General procedure for co-polymerization                                           | S10 |
| 1.7 Deprotection of co-polymer                                                        | S11 |
| 1.8 Deprotection of co-polymer                                                        | S12 |
| 1.9 Preparation of P(VPyCL <sub>89%-co-</sub> PIL <sub>11%</sub> ) <sub>20</sub> -NHS | S13 |
| 1.10 Thermal properties of polymers                                                   | S13 |
| 2 Computer simulation                                                                 | S20 |
| 2.1 The enthalpies of ring opening                                                    | S20 |

|                                                                                    |     |
|------------------------------------------------------------------------------------|-----|
| 2.2 The independent gradient model (IGM) analysis                                  | S21 |
| 3 The degradation experiments of poly( $\gamma$ -amide- $\epsilon$ -caprolactone)s | S44 |
| 4 Cell viability experiments of poly( $\gamma$ -amide- $\epsilon$ -caprolactone)s  | S45 |
| 5 Poly( $\gamma$ -amide- $\epsilon$ -caprolactone)s /enzyme bioconjugation         | S46 |
| 5.1 Preparation of modified HRP                                                    | S46 |
| 5.2 Measurement of modified degree                                                 | S47 |
| 5.3 Measurement of enzyme activity                                                 | S47 |

## 1. Experimental detail

### 1.1 Materials

Ethyl 2-cyclohexanonecarboxylate (98%), concentrated sulfuric acid (70wt%), 3-(3-dimethylaminopropyl)-1-ethylcarbodiimide hydrochloride (EDC) (98%), *N*-hydroxysuccinimide (NHS) (98%), 1-propanamine (99%), isopropylamine (99%), diethylamine(99%), pyrrolidine(99%), aminocyclopropan, benzyl alcohol (BnOH,99%), 3-Chloroperoxybenzoic Acid (m-CPBA), 1,5,7-triazabicyclo[4.4.0]Dec-5-Ene (TBD) (97%), 1,8-diazabicyclo[5.4.0]-7-undecene (DBU) (99%), *S*-1-dodecyl-*S'*-( $\alpha'$ , $\alpha''$ -dimethyl- $\alpha'''$ -acetic acid) trithiocarbonate, azodiisobutyronitrile (AIBN), *N*-isopropylacrylamide, tannous octoate (Sn(Oct)<sub>2</sub>)(99%), trifluoroacetic Acid (99%) and 4-oxopiperidinium chloride (97%) were purchased from Adamas. 3,3',5,5'-tetramethylbenzidine(TMB) (99%) and trinitrobenzene sulfonic acid (TNBS) (99%) were purchased Sigma-Aldrich, other reagents were purchased from Greagent. Unless otherwise noted, all commercial reagents and solvents were directly used.

Thiourea (TU) were prepared according to the literature.<sup>1</sup>

TMB-A solution: 13.6g sodium acetate, 1.6g citric acid, 0.3ml 30% hydrogen peroxide, and 500ml distilled water.

TMB-B solution: 0.2g disodium ethylenediamine tetraacetate, 0.95g citric acid 0.95g, glycerol 50ml, 0.15g TMB and 500ml distilled water

10mM phosphate buffer (PBS) solution: 8g sodium chloride, 0.2g potassium chloride, 1.44g disodium hydrogen phosphate 0.24g mono potassium phosphate and 800ml distilled water. Then,

pH of solution was adjusted to 7.4 with HCl solution. Finally, volume was adjusted to 1L with additional distilled water.

## 1.2 Instruments and measurements

$^1\text{H}$  NMR and  $^{13}\text{C}$  NMR spectrum were measured on a Bruker AVANCE III 400 MHz ( $^1\text{H}$  NMR) or 150MHz ( $^{13}\text{C}$  NMR) instrument at room temperature with  $\text{CDCl}_3$  as the solvent. Molecular weight and molecular weight distribution of the polymers were estimated by an Agilent Technologies 1260 Infinity containing a refractive index detector, and the flow rate was 1.0 mL/min. the columns for DMF (containing 0.01 M LiBr) as an eluent included 10  $\mu\text{m}$  MIXED-BLS, 5 $\mu\text{m}$  MIXED-C, and 5 $\mu\text{m}$  MIXED-D. The temperature for DMF was 50°C. Matrix-assisted laser desorption/ionization time-of-flight mass spectrometry (MALDI-TOF-MS) was carried out using a Bruker Ultraflex extreme spectrometer in which 9-Nitroanthracene was used as the matrix, and NaI was used as the cationic reagent in the linear positive model. Glass transition temperatures ( $T_g$ ) of polymer were determined using a TA Q2000 DSC with a liquid  $\text{N}_2$  cooling unit and a heating/cooling rate of 10 °C/min. Transmittance measurement was measured on a vis-UV chromatogram analyzer (Shanghai Zhetu science apparatus company limited) with a thermostat sample holder, and the heating rate was 1°C/min. Sample has a 5wt% or 1wt% concentration in  $\text{D}_2\text{O}$  or deionized water. Temperature-variable  $^1\text{H}$  NMR spectra were recorded on Varian Mercury plus (600 MHz) spectrometer using  $\text{D}_2\text{O}$  as solvent (concentration=5wt%) with an increment of 5°C. The sample of polymer solution (concentration=5wt% in  $\text{D}_2\text{O}$ ) for FT-IR measurements was prepared by being sealed between two  $\text{CaF}_2$  tablets. All time-resolved FT-IR spectra at different temperatures were recorded on a Nicolet Nexus 470 spectrometer with a resolution of 4  $\text{cm}^{-1}$ , and 32 scans were available for an acceptable signal-to-noise ratio. Temperatures were manually controlled with an electronic cell holder at rates of ca. 0.3°C/min with an increment of 0.9°C. Raw spectra were baseline-corrected by the software Omnic, ver. 6.1a. Calorimetric measurements of polymer solution (concentration=5wt% in  $\text{D}_2\text{O}$ ) were performed on a Mettler-Toledo differential scanning calorimeter (DSC) thermal analyzer with varying scanning rates from 0 to 50°C.

## 1.3 Procedure of monomer preparation

### Preparation of 4-oxocyclohexane-1-carboxylic acid

4-Oxocyclohexane-1-carboxylic acid was synthesized according to the literature procedure.<sup>[2]</sup> A solution of ethyl 4-ketocyclohexanecarboxylate (100g, 70mmol) in 2wt%  $\text{H}_2\text{SO}_4$  was heated to 105°C for 4 h. The cooled solution was extracted with ethyl ether, and the organic

layer was separated, dried over magnesium sulfate, filtered, concentrated. A white solid was obtained (5.1g, 71% yield, white solid).

4-oxocyclohexane-1-carboxylic acid:

$^1\text{H}$  NMR (400 MHz,  $\text{CDCl}_3$ )  $\delta$ =11.6(s, 1H), 2.89–2.78 (m, 1H), 2.60–2.46 (m, 2H), 2.46–2.34 (m, 2H), 2.32–2.19 (m, 2H), 2.15–1.96 (m, 2H).

Preparation of 4-oxo-*N*-propylcyclohexane-1-carboxamide

4-Oxocyclohexane-1-carboxylic acid (20g) was dissolved in 400ml  $\text{CH}_2\text{Cl}_2$ . Then EDC and NHS were added into solution in room temperature. after 3h. 10ml 1-Propanamine was dropwise added with continuous stirring for 24h. the mixture were filtered and the solvent was removed under reduced pressure. Purification by column chromatography on silica gel using pure ethyl acetate ( $R_f$ =4,0) as the eluant afforded 17.6g (68% yield) of the white powder:

*N*-isopropyl-4-oxocyclohexane-1-carboxamide (16.5g, 63% yield, white powder), *N*, *N*-diethyl-4-oxocyclohexane-1-carboxamide (16.2g ,57% yield, white powder), 4-(pyrrolidine-1-carbonyl) cyclohexan-1-one (16.0g, 59% yield, white powder) were synthesized using the similar steps above.

4-oxo-*N*-propylcyclohexane-1-carboxamide:

$^1\text{H}$  NMR (400 MHz,  $\text{CDCl}_3$ )  $\delta$ =5.67(s, 1H), 3.31–3.14 (q,  $J$ =8Hz, 2H), 2.58–2.45 (m, 3H), 2.39–2.25 (m, 2H), 2.22–2.01 (m, 2H), 2.05–1.91 (m, 2H), 1.62–1.41 (m, 2H), 0.92 (t,  $J$ = 8Hz, 3H).

*N*-isopropyl-4-oxocyclohexane-1-carboxamide:

$^1\text{H}$  NMR (400 MHz,  $\text{CDCl}_3$ )  $\delta$ =5.39(s, 1H), 4.23–4.03 (m, 1H), 2.70–2.45 (m, 3H), 2.44–2.28 (m, 2H), 2.26–2.11 (m, 2H), 2.10–1.97 (m, 2H), 1.40–1.03 (d,  $J$ = 8Hz, 6H).

*N*, *N*-diethyl-4-oxocyclohexane-1-carboxamide:

$^1\text{H}$  NMR (400 MHz,  $\text{CDCl}_3$ )  $\delta$ =3.42–3.19 (m, 4H), 2.89–2.71 (m, 1H), 2.54–2.19 (m, 4H), 2.06–1.87 (m, 4H), 1.20–0.97 (m, 6H).

4-(pyrrolidine-1-carbonyl) cyclohexan-1-one:

$^1\text{H}$  NMR (400 MHz,  $\text{CDCl}_3$ )  $\delta$ =3.51 (s, 4H), 2.88–2.71 (m, 1H), 2.63–2.50(m, 2H), 2.41–2.24 (m, 2H), 2.14–1.80 (m, 8H).

#### Preparation of 7-oxo-*N*-propyloxepane-4-carboxamide (NNCL)

4-Oxo-*N*-propylcyclohexane-1-carboxamide (10g) was dropwise added into the CH<sub>2</sub>Cl<sub>2</sub> solution of 20g *m*-CPBA in the ice-water bath. Then the reaction **was stirred** for another 48h in room temperature. The mixture was filtered and the solvent was removed under reduced pressure. The residue was participated in 100ml anhydrous ether three times repeatedly to collect 9.6g (84% yield) NNCL of the white powder.

*N*-isopropyl-7-oxooxepane-4-carboxamide (NACL) (8.9g, 82% yield, white powder), *N*, *N*-diethyl-7-oxooxepane-4-carboxamide (DECL) (7.4g, 81% yield, Crystal solid), 5-(pyrrolidine-1-carbonyl)oxepan-2-one(VPyCL) (7.7g, 83% yield, white powder) were synthesized using the similar steps above.

#### 7-oxo-*N*-propyloxepane-4-carboxamide(NNCL):

<sup>1</sup>H NMR (400 MHz, CDCl<sub>3</sub>)  $\delta$ =5.72(s, 1H), 4.60-4.42 (m, 1H), 4.26-4.10(m, 1H), 4.26-3.90 (m, 1H), 3.27-3.14 (q, *J*=8Hz, 2H), 2.99-2.83 (m, 1H), 2.68-2.54 (m, 1H), 2.50-2.37 (m, 1H), 2.19-1.87 (m, 4H), 1.60-1.43 (m, 2H), 0.92 (t, *J*= 4Hz, 6H).

<sup>13</sup>C NMR (150MHz, CDCl<sub>3</sub>):  $\delta$ =175.56(OCOCH<sub>2</sub>), 173.77(CHCONH), 67.02(OCH<sub>2</sub>CH<sub>2</sub>), 45.92(CH<sub>2</sub>CH(CO)CH<sub>2</sub>), 41.15(NHCH<sub>2</sub>CH<sub>2</sub>), 32.27(COCH<sub>2</sub>CH<sub>2</sub>), 32.18(CH<sub>2</sub>CH<sub>2</sub>CH), 25.78(CH<sub>2</sub>CH<sub>2</sub>CH), 22.74(CH<sub>2</sub>CH<sub>2</sub>CH<sub>3</sub>), 11.32(CH<sub>2</sub>CH<sub>3</sub>).

FT-IR ( $\nu$ , cm<sup>-1</sup>): 1733.86 (C=O of ester bond), 1633.10, (C=O of amide bond).

EI-MS: *m/z* =199.1.

DSC: *T<sub>m</sub>*= 89.74°C.

Solubility: Dichloromethane (**CH<sub>2</sub>Cl<sub>2</sub>**), ethyl acetate, methanol, H<sub>2</sub>O and *et al.*

Morphology: White power.

#### *N*-isopropyl-7-oxooxepane-4-carboxamide(NACL):

<sup>1</sup>H NMR (400 MHz, CDCl<sub>3</sub>)  $\delta$ =5.72(s, 1H), 4.51-4.40 (m, 1H), 4.22-4.10(m, 1H), 4.07-3.90 (m, 1H), 2.94-2.80 (m, 1H), 2.64-2.50 (m, 1H), 2.46-2.33 (m, 1H), 2.08-1.76 (m, 4H), 1.19-0.99 (d, *J*= 4Hz, 6H).

$^{13}\text{C}$  NMR (150MHz,  $\text{CDCl}_3$ ):  $\delta$ =175.61( $\text{OCOCH}_2$ ), 172.88( $\text{CHCONH}$ ), 67.04( $\text{OCH}_2\text{CH}_2$ ), 46.07( $\text{CH}_2\text{CH}(\text{CO})\text{CH}_2$ ), 41.23( $\text{NHC}(\text{CH}_3)_2$ ), 32.28( $\text{COCH}_2\text{CH}_2$ ), 32.14( $\text{CH}_2\text{CH}_2\text{CH}$ ), 25.72( $\text{CH}_2\text{CH}_2\text{CH}$ ), 22.58( $\text{C}(\text{CH}_3)_2$ ).

FT-IR ( $\nu$ ,  $\text{cm}^{-1}$ ): 1739.63 ( $\text{C}=\text{O}$  of ester bond), 1632.08, ( $\text{C}=\text{O}$  of amide bond).

ESI-MS:  $m/z$  =199.1

DSC:  $T_m$  = 158.22 $^\circ\text{C}$

Solubility:  $\text{CH}_2\text{Cl}_2$ , ethyl acetate, methanol,  $\text{H}_2\text{O}$  and *et al.*

Morphology: White power.

*N, N*-diethyl-7-oxooxepane-4-carboxamide (DECL):

$^1\text{H}$  NMR (400 MHz,  $\text{CDCl}_3$ )  $\delta$ =4.68-4.42 (m, 1H), 4.30-4.12 (m, 1H), 3.35 (s, 4H), 3.01-2.88 (m, 1H), 2.87-2.75 (m, 1H), 2.69-2.54 (m, 1H), 2.19 – 1.89 (m, 4H), 1.26-1.05 (m, 6H).

$^{13}\text{C}$  NMR (150MHz,  $\text{CDCl}_3$ ):  $\delta$ =175.38( $\text{OCOCH}_2$ ), 173.10( $\text{CHCON}$ ), 67.01( $\text{OCH}_2\text{CH}_2$ ), 41.99( $\text{CH}_2\text{CH}(\text{CO})\text{CH}_2$ ), 40.95( $\text{N}(\text{CH}_2\text{CH}_3)_2$ ), 32.19( $\text{COCH}_2\text{CH}_2$ ), 25.68( $\text{CH}_2\text{CH}_2\text{CH}$ ), 15.09( $\text{CH}_2\text{CH}_2\text{CH}$ ), 13.03( $\text{CH}_2\text{CH}_3$ ).

FT-IR ( $\nu$ ,  $\text{cm}^{-1}$ ): 1719.58 ( $\text{C}=\text{O}$  of ester bond), 1627.38, ( $\text{C}=\text{O}$  of amide bond).

EI-MS:  $m/z$  =213.1

DSC:  $T_m$  = 75.01 $^\circ\text{C}$

Solubility:  $\text{CH}_2\text{Cl}_2$ , ethyl acetate, methanol,  $\text{H}_2\text{O}$  and *et al.*

Morphology: Crystal solid.

5-(pyrrolidine-1-carbonyl)oxepan-2-one(VPyCL):

$^1\text{H}$  NMR (400 MHz,  $\text{CDCl}_3$ )  $\delta$ = 4.63-4.46 (m, 1H), 4.27-4.11 (m, 1H), 3.46 (t,  $J$  = 8 Hz, 4H), 3.04–2.89 (m, 1H), 2.80-2.70 (m, 1H), 2.67 – 2.51 (m, 1H), 2.20 – 1.76 (m, 8H).

$^{13}\text{C}$  NMR (150MHz,  $\text{CDCl}_3$ ):  $\delta$ =175.43( $\text{OCOCH}_2$ ), 172.38( $\text{CHCON}$ ), 66.87( $\text{OCH}_2\text{CH}_2$ ), 46.54,45.91( $\text{N}(\text{CH}_2\text{CH}_2)_2$ ), 42.78( $\text{CH}_2\text{CH}(\text{CO})\text{CH}_2$ ), 32.22( $\text{COCH}_2\text{CH}_2$ ), 31.57( $\text{CH}_2\text{CH}_2\text{CH}$ ), 24.99( $\text{CH}_2\text{CH}_2\text{CH}$ ), 24.11( $\text{N}(\text{CH}_2\text{CH}_2)_2$ ).

FT-IR ( $\nu$ ,  $\text{cm}^{-1}$ ): 1724.01 (C=O of ester bond), 1627.29 (C=O of amide bond).

EI-MS:  $m/z$  = 211.1

DSC:  $T_m$  = 124.01°C

Solubility:  $\text{CH}_2\text{Cl}_2$ , ethyl acetate, methanol,  $\text{H}_2\text{O}$  and *et al.*

Morphology: White power.

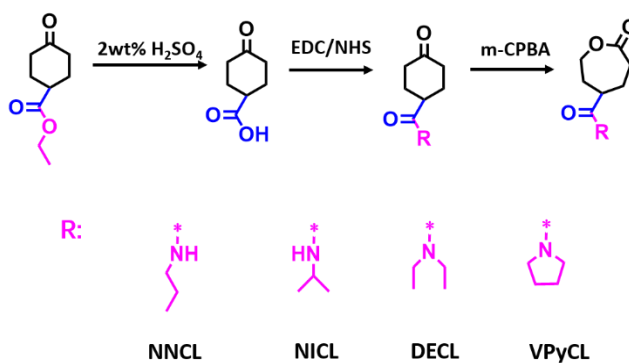

**Scheme S1.** The synthesized route of  $\gamma$ -amide- $\epsilon$ -caprolactones.

Preparation of ethyl 7-oxooxepane-4-carboxylate (EMCL):

Ethyl 4-ketocyclohexanecarboxylate (10g) was dropwise added into the  $\text{CH}_2\text{Cl}_2$  solution of 17g m-CPBA in the ice-water bath. Then the reaction was stirred for another 24 h in room temperature. The mixture was filtered and the solvent was washed successively with saturated  $\text{Na}_2\text{S}_2\text{O}_3$  solution (three times),  $\text{NaHCO}_3$  solution (three times) and  $\text{NaCl}$  solution (three times). The organic extraction was dried with anhydrous  $\text{MgSO}_4$ , filtered and purified by column chromatography (silica gel,  $R_f$ =2,0, petroleum ether (PE): ethyl acetate ( $\text{Et}_2\text{O}$ ) = 1:1). The resulting product is transparent crystal (6.3g, 58%yield, transparent crystal).

Ethyl 7-oxooxepane-4-carboxylate (EMCL):

$^1\text{H}$  NMR (400 MHz,  $\text{CDCl}_3$ )  $\delta$ = 4.45-4.31 (m, 1H), 4.27-4.07 (m, 3H), 2.88-2.59(m, 3H), 2.27–1.88 (m, 4H), 1.35–1.19 (t,  $J$ =, 4Hz, 3H).

Solubility:  $\text{CH}_2\text{Cl}_2$ , ethyl acetate, methanol and *et al.*

Morphology: Transparent crystal.

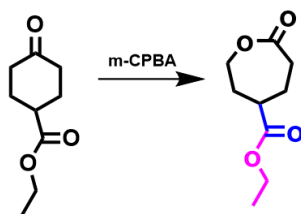

**Scheme S2.** The synthesized route of ethyl 7-oxooxepane-4-carboxylate (EMCL).

Preparation of tert-butyl 7-oxo-1,4-oxazepane-4-carboxylate (Boc-NIPIL) :

4-Oxopiperidinium chloride(10g) and NaOH(3g) were added into 100ml water. Then reaction was stirred until the solid was completely dissolved. Di-tert-butyl dicarbonate (7.2g, dissolved in 20ml THF) was dropwise to the above solution at 0°C. After 8h, the mixture was extracted using dichloromethane three times and the organic layer was separated. Organic extraction was washed with saturated NaCl solution (three times). After organic extraction was dried with anhydrous MgSO<sub>4</sub>, filtered organic solution was concentrated to obtain preliminary intermediate (12.5g, 87% yield). Intermediate was directly reacted without further purification.

Above intermediate (5g) was dropwise added into the CH<sub>2</sub>Cl<sub>2</sub> solution of 6g m-CPBA in the ice-water bath. Then the reaction was stirred for another 24 h in room temperature. The mixture was filtered and the solvent was washed successively with saturated Na<sub>2</sub>S<sub>2</sub>O<sub>3</sub> solution (three times), NaHCO<sub>3</sub> solution (three times) and NaCl solution (three times). The organic extraction was dried with anhydrous MgSO<sub>4</sub>, filtered and concentrated to obtain the crude product. Crude product was further purified by recrystallizing twice using THF and n-Hexane as solvent. The resulting product was white granular crystal (3.8g, 71%yield, white granular crystal).

Tert-butyl 7-oxo-1,4-oxazepane-4-carboxylate (Boc-NIPIL) :

<sup>1</sup>H NMR (400 MHz, CDCl<sub>3</sub>) δ= 4.36-4.18 (m, 2H), 3.81-3.60 (m, 4H), 2.90-2.74 (m, 2H), 1.48 (s, 9H).

Solubility: CH<sub>2</sub>Cl<sub>2</sub>, ethyl acetate, methanol and *et al.*

Morphology: White granular crystal.



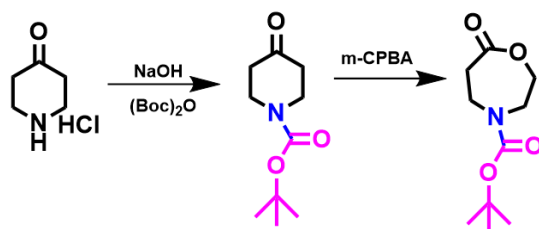

**Scheme S3.** The synthesized route of ethyl 7-oxooxepane-4-carboxylate (EMCL)

#### 1.4 General procedure for homo-polymerization

Organic catalyst such as TBD to catalyze the polymerization: NNCL (100mg, 502 $\mu$ mol) was add into 10ml flame-dried Schlenk flask containing a magnetic stir bar and vacuumized 3h in the 50°C oil pot. Then benzyl alcohol solution (13.2 $\mu$ L, benzyl alcohol was dissolved in the methylbenzene with a 0.1028g/ $\mu$ L concentration) and dry CH<sub>2</sub>Cl<sub>2</sub> (0.5mL) was added into the flash. To this solution, TBD (3.4mg, 25.1 $\mu$ mol, relative to the monomer molar mass) was added to initiate polymerization. The reaction mixture was allowed to stir at room temperature **in an argon protective atmosphere**. After reaching the predetermined time, about 20  $\mu$ L of acetic acid was added into the flash to quenched reaction. Slight crude products were taken out from the system to dry in vacuum. Monomer conversion and the molecular weight of those rude products were determined by <sup>1</sup>H NMR spectroscopy and GPC, respectively. Residual products were precipitated in anhydrous ether third times and dried in vacuum to further characterize.

Poly(*N*-isopropyl-4-oxocyclohexane-1-carboxamide) (PNICL), Poly(*N*, *N*-diethyl-7-oxooxepane-4-carboxamide) (PDECL), Poly(5-(pyrrolidine-1-carbonyl)oxepan-2-one) (VPyCL), Poly(ethyl 7-oxooxepane-4-carboxylate)(PEMCL), with TBD catalyzing, were prepared followed by the above procedure.

Organic metal catalyst Sn(Oct)<sub>2</sub> to catalyze the polymerization: NNCL (100mg, 502 $\mu$ mol), benzyl alcohol (13.2 $\mu$ L, benzyl alcohol was dissolved in the methylbenzene with a 0.1028g/ $\mu$ L concentration) was added in the a 10ml flame-dried Schlenk flask containing a magnetic stir bar, vacuumized 3h in the 50°C oil pot, Then Sn(Oct)<sub>2</sub> solution (9.6 $\mu$ L, Sn(Oct)<sub>2</sub> was dissolved in the methylbenzene with a 0.1028g/ $\mu$ L concentration, relative to the monomer weight) was added into the flash. The reaction mixture was allowed to stir at 130°C **in an argon protective atmosphere**. After 24h, reaction was cooled and in 0.5 ml CH<sub>2</sub>Cl<sub>2</sub> and precipitated in ether twice. Slight crude products were taken out from the system to dry in vacuum. Monomer conversion and the molecular weight of those rude products were determined by <sup>1</sup>H NMR spectroscopy and GPC, respectively.

Residual products were dissolved in 0.5 ml CH<sub>2</sub>Cl<sub>2</sub> and precipitated in anhydrous ether third times and dried in vacuum to further characterize.

Poly(*N*-isopropyl-4-oxocyclohexane-1-carboxamide) (PNICL), Poly(*N*, *N*-diethyl-7-oxooxepane-4-carboxamide) (PDECL), Poly(5-(pyrrolidine-1-carbonyl)oxepan-2-one) (VPyCL) with Sn(Oct)<sub>2</sub> catalyzing were prepared followed by the above procedure.

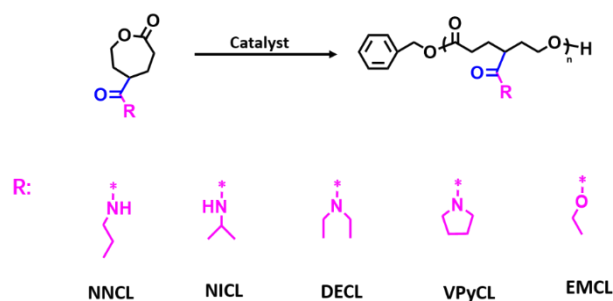

**Scheme S4.** ROP of  $\gamma$ -amide- and  $\gamma$ -ester- $\epsilon$ -caprolactones

Poly(*N*-isopropyl-4-oxocyclohexane-1-carboxamide)(PNICL) (DP:40)

<sup>1</sup>H NMR (400 MHz, CDCl<sub>3</sub>) (DP:40)  $\delta$ =6.90-6.20(s, 33H), 4.24-3.95(m, 117H), 2.51-1.17(m, 117H), 2.06-1.86(m, 77H), 1.84-1.65(m, 80H), 1.20-1.06(m, 238H).

MALDI-tof-MS: PNICL had a precise structure with a benzyl group and an OH group at two terminals. For example, the observed value,  $m/z = 2123.1$ , agrees with the theory value of PNICL with degree of polymerization of 10 [ $108.1(M_{\text{initiator}}) + 199.1(M_{\text{monomer}}) \times 10 + 23.0(M_{\text{Na}^+}) = 2123.1$ ].

Poly(*N*, *N*-diethyl-7-oxooxepane-4-carboxamide) (PDECL) (DP:40)

<sup>1</sup>H NMR (400 MHz, CDCl<sub>3</sub>) (DP:40)  $\delta$ =4.29-3.85(m, 82H), 3.49-3.25(m, 168H), 2.88-2.71(m, 40H), 2.43-2.17(m, 88H), 2.10-1.87(m, 88H), 1.87-1.68(m, 83H), 1.24-1.01(m, 252H).

MALDI-tof-MS: PDECL had a precise structure with a benzyl group and an OH group at two terminals. For example, the observed value,  $m/z = 2262.1$ , agrees with the theory value of PNICL with degree of polymerization of 10 [ $108.1(M_{\text{initiator}}) + 213.1(M_{\text{monomer}}) \times 10 + 23.0(M_{\text{Na}^+}) = 2262.1$ ].

Poly(5-(pyrrolidine-1-carbonyl)oxepan-2-one) (VPyCL) (DP:40)

$^1\text{H}$  NMR (400 MHz,  $\text{CDCl}_3$ )  $\delta$ =4.14-3.92(m, 69H), 3.54-3.36(m, 156H), 2.81-2.61(m, 39H), 2.49-2.16(m, 92H), 2.07-1.60(m, 349H).

MALDI-tof-MS: PVPyCL had a precise structure with a benzyl group and an OH group at two terminals. For example, the observed value,  $m/z$  =2242.1, agrees with the theory value of PNICL with degree of polymerization of 10 [ $108.1(M_{\text{initiator}}) + 211.1(M_{\text{monomer}}) \times 10 + 23.0(M_{\text{Na}^+})$  =2242.1].

### 1.5 Kinetics of Polymerization

NICL (100 mg, 502 $\mu\text{mol}$ ) was added in the a 10ml flame-dried Schlenk flask containing a magnetic stir bar and vacuumized 3h in the 50°C oil pot. Then benzyl alcohol solution (13.2 $\mu\text{L}$ , benzyl alcohol was dissolved in the methylbenzene with a 0.1028g/ $\mu\text{L}$  concentration) and dry  $\text{CH}_2\text{Cl}_2$  (0.5mL) was added into the flask. Then TBD (3.4 mg, 25.1 $\mu\text{mol}$ , relative to the monomer molar mass) was added to initiate polymerization. The reaction mixture was allowed to stir continuously at room temperature in an argon protective atmosphere. An 50 $\mu\text{L}$  solution was taken out from flask at a predetermined time interval in a continuous argon condition. Sample was quenched by acetic acid for  $^1\text{H}$  NMR spectroscopy analysis and GPC analysis. Residual solution would continue to react in an argon protective atmosphere until next sampling.

Other TBD-catalyzed ROP kinetic studies of DECL and VPyCL were carried out in a similar manner.

### 1.6 General procedure for co-polymerization

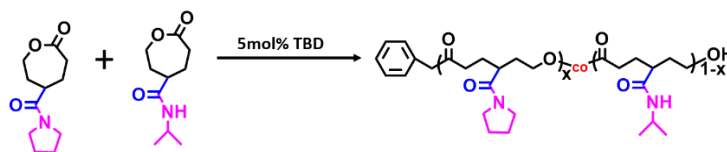

**Scheme S5.** Preparation of  $\text{P}(\text{VPyCL}_X\text{-co-NICL}_{1-X})_{20}$

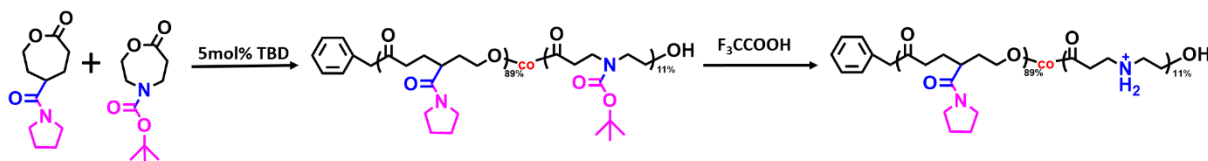

**Scheme S6.** Preparation of P(VPyCL<sub>89%</sub>-co- PIL<sub>11%</sub>)<sub>20</sub>

VPyCL (100mg, 502umol) and NlCL (106mg, 502umol) were add into 10ml flame-dried Schlenk flask containing a magnetic stir bar and vacuumized 3h in the 50°C oil pot. Then benzyl alcohol solution (52.7uL, benzyl alcohol was dissolved in the methylbenzene with a 0.1028g/ul concentration) and dry CH<sub>2</sub>Cl<sub>2</sub> (1.0mL) was added into the flash. To this solution, TBD (7.0mg, 50.3umol, relative to the monomer molar mass) was added to initiate polymerization. The reaction mixture was allowed to stir at room temperature. After reaching the predetermined time, about 40ul of acetic acid was added into the flash to quenched reaction. Crude products were precipitated in anhydrous ether third times and dried in vacuum to further characterize.

Other copolymers including P(VPyCL<sub>x</sub>-co-NlCL<sub>1-x</sub>)<sub>20</sub> and P(VPyCL<sub>90%</sub>-co-Boc-NIPIL<sub>10%</sub>)<sub>20</sub> were carried out in a similar manner.

### 1.7 Deprotection of co-polymer

P(VPyCL<sub>90%</sub>-co-Boc-NIPIL<sub>10%</sub>)<sub>20</sub> (100mg) was added into 10ml flame-dried Schlenk flask containing a magnetic stir bar. Then dry CH<sub>2</sub>Cl<sub>2</sub> (1.0mL) was added into the flash to dissolved copolymer. In addition, trifluoroacetic acid (1ml) was added to remove the protecting group of copolymer. After stirring at room temperature for 1hour, solution was precipitated in anhydrous ether third times and dried in vacuum to further characterize.

### 1.8 Preparation of PNIPAM-NHS

Preparation of PNIPAM-NHS was divided into two steps. First step was the preparation of NIPAM. NIPAM (500mg) was added into 10ml flame-dried Schlenk flask containing a magnetic stir bar. Then dry THF (1.0mL) was added into the flash to dissolved monomer. Then the RAFT chain transfer agent *S*-1-dodecyl-*S'*-( $\alpha'$ , $\alpha''$ -dimethyl- $\alpha'''$ -acetic acid) trithiocarbonate (DDAT) and initiator ANIBN were added into the flash. After the mixture was degassed by three freeze-evacuate-thaw cycles, the reaction mixture was allowed to stir at 70°C under argon atmosphere.

After stirring for 24 hours, solution was precipitated in anhydrous ether third times and precipitation was dried in vacuum to further characterize.

Second step was the preparation of PNIPAM-NHS. Prepared PNIPAM (100mg) was added into 10ml Schlenk flask containing a magnetic stir bar. Then dry  $\text{CH}_2\text{Cl}_2$  (1.0 mL) was added into the flask to dissolved monomer. Then EDC (100mg) and NHS (100mg) was added into the flask. After the reaction mixture was stirred at room temperature under argon atmosphere for 12h, solution was precipitated in anhydrous ether third times and precipitation was dried in vacuum without further characterization.

### 1.9 Preparation of P(VPyCL<sub>89%-co-</sub> PIL<sub>11%</sub>)<sub>20</sub>-NHS

Preparation of P(VPyCL<sub>89%-co-</sub> PIL<sub>11%</sub>)<sub>20</sub>-NHS was divided into two steps. First step was the preparation of P(VPyCL<sub>89%-co-</sub> Boc-NIPIL<sub>11%</sub>)<sub>20</sub>-COOH. Dry P(VPyCL<sub>89%-co-</sub> Boc-NIPIL<sub>11%</sub>)<sub>20</sub> (370mg), succinic anhydride (10mg), pyridine (0.1ml) and chloroform (5ml) were added into 10ml Schlenk flask containing a magnetic stir bar. After stirred at 60°C under argon atmosphere for 12h, solution was precipitated in anhydrous ether third times and was dried in vacuum. Dry precipitation P(VPyCL<sub>89%-co-</sub> Boc-NIPIL<sub>11%</sub>)<sub>20</sub> was deprotected according to the procedure in S1.7 to gain P(VPyCL<sub>89%-co-</sub> PIL<sub>11%</sub>)<sub>20</sub>-COOH. The deprotected crude product was precipitated in anhydrous ether third times and precipitation was dried in vacuum without further characterization.

The preparation of P(VPyCL<sub>89%-co-</sub> PIL<sub>11%</sub>)<sub>20</sub>-NHS was prepared according to the prepared procedure of PNIPAM-NHS. Result product was dried in vacuum without further characterization.

### 1.10 Thermal Properties of polymers

To evaluate thermal properties of those poly( $\gamma$ -amide- $\epsilon$ -caprolactone)s, differential scanning calorimetry (DSC) and the thermogravimetric analysis (TGA) were respectively employed to measure the glass transition temperature ( $T_g$ ) and decomposition temperature ( $T_d$ ) of poly( $\gamma$ -amide- $\epsilon$ -caprolactone)s (Figure S34-S35).  $T_g$  of those polymers was higher than that of PCL owing to the destroy of steric regularity from the introduction of amide groups into PCL. However, the observed  $T_g$  among different poly( $\gamma$ -amide- $\epsilon$ -caprolactone)s from DSC curve exhibited difference but was not regular (Figure S34).  $T_d$  of those polymers measured ranged from 300°C to 345°C, lower than the reported PCL value (350°C) (Figure S35), suggesting that the introduce of amide groups in the side chain of PCL would lower thermal stabilities. It was observed that  $T_d$  of PDECL<sub>10</sub> and PVPyCL<sub>10</sub> at near 350°C was higher than that of PNICL<sub>10</sub> at 300°C. It was likely

that heat resistance of PNICL<sub>10</sub>, relative to PDECL<sub>10</sub> and PVPyCL<sub>10</sub>, showed inferior owing to the exist of the secondary amide substituent.

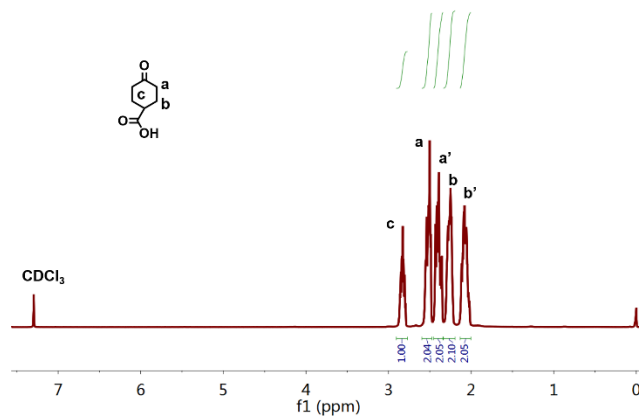

Figure S1. <sup>1</sup>H NMR spectrum of 4-oxocyclohexane-1-carboxylic acid

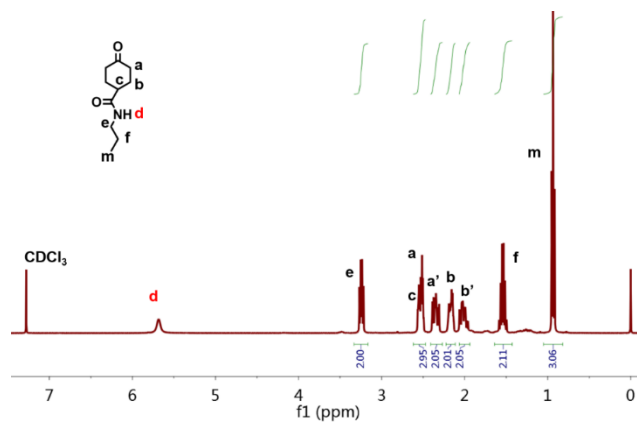

Figure S2. <sup>1</sup>H NMR spectrum of 4-oxo-*N*-propylcyclohexane-1-carboxamide

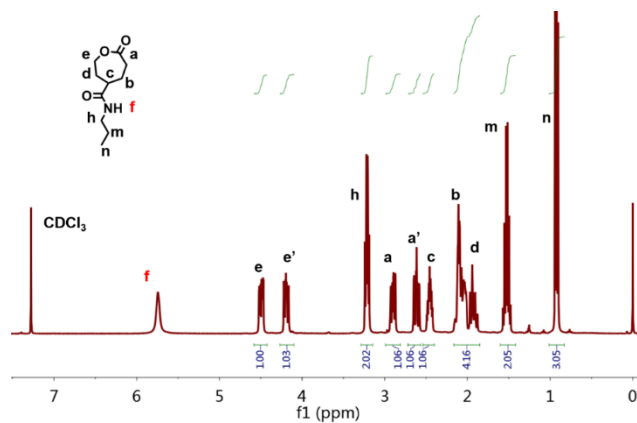

Figure S3. <sup>1</sup>H NMR spectrum of 7-oxo-*N*-propyloxepane-4-carboxamide (NNCL)

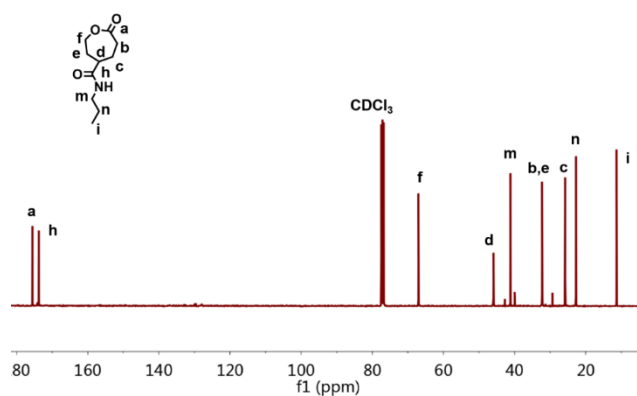

Figure S4. <sup>13</sup>C NMR spectrum of 7-oxo-*N*-propyloxepane-4-carboxamide (NNCL)

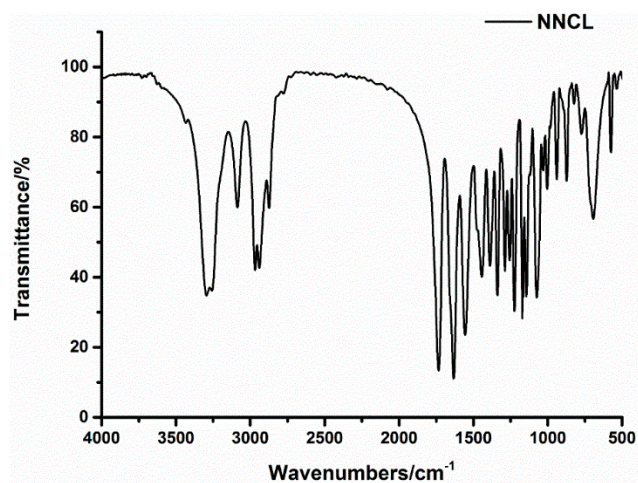

Figure S5. FT-IR spectrum of 7-oxo-*N*-propyloxepane-4-carboxamide (NNCL)

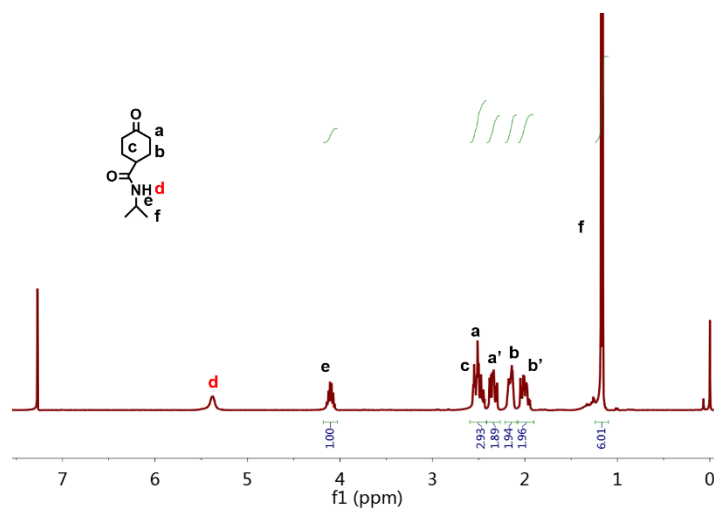

**Figure S6.** <sup>1</sup>H NMR spectrum of 4-oxo-*N*-propylcyclohexane-1-carboxamide

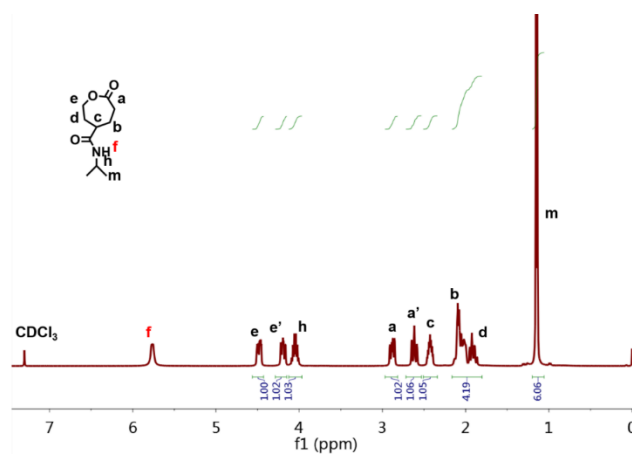

**Figure S7.** <sup>1</sup>H NMR spectrum of *N*-isopropyl-7-oxooxepane-4-carboxamide (NICL)

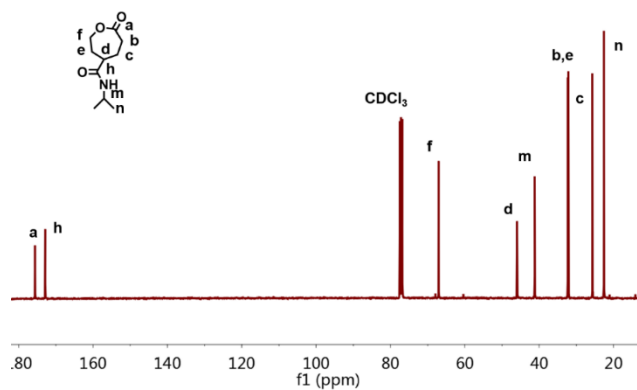

**Figure S8.** <sup>13</sup>C NMR spectrum of *N*-isopropyl-7-oxooxepane-4-carboxamide (NICL)



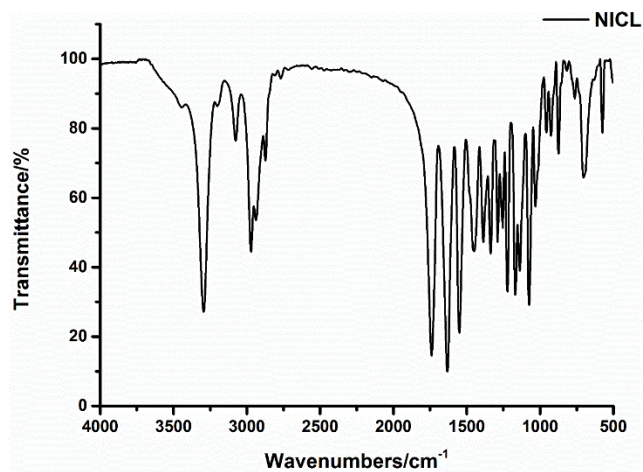

**Figure S9.** FT-IR spectrum of *N*-isopropyl-7-oxooxepane-4-carboxamide (NICK)

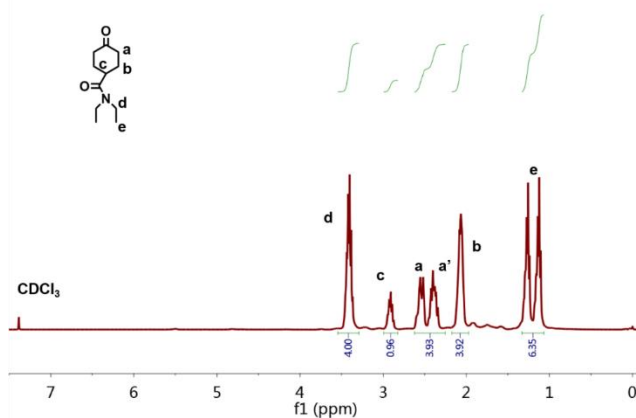

**Figure S10.**  $^1\text{H}$  NMR spectrum of *N*-cyclopropyl-4-oxocyclohexane-1-carboxamide

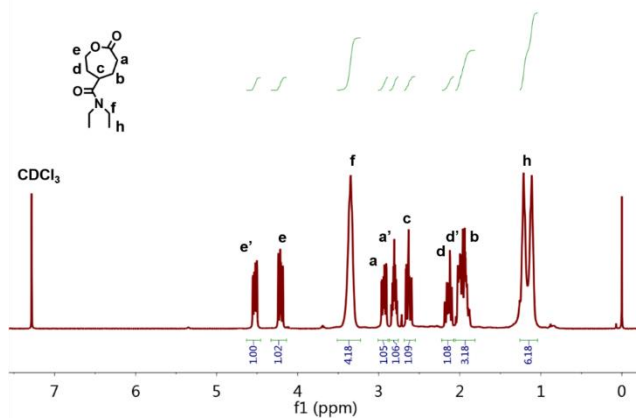

**Figure S11.**  $^1\text{H}$  NMR spectrum of *N,N*-diethyl-7-oxooxepane-4-carboxamide (DECL)

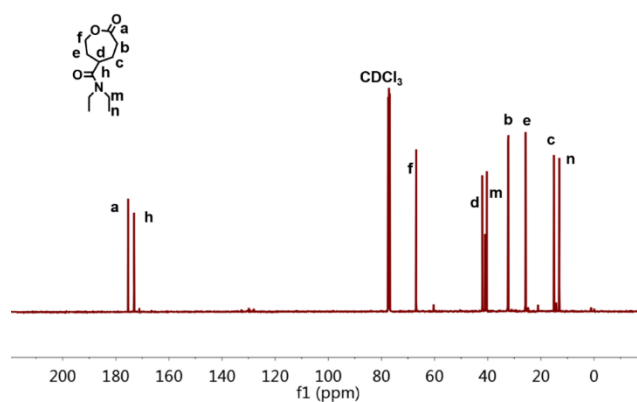

**Figure S12.**  $^{13}\text{C}$  NMR spectrum of *N,N*-diethyl-7-oxooxepane-4-carboxamide (DECL)

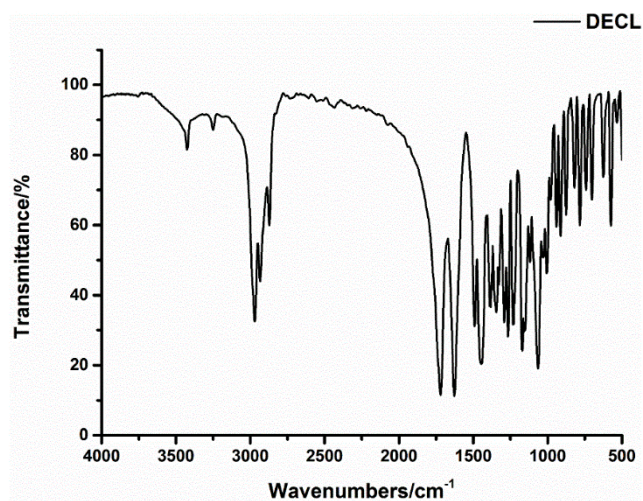

**Figure S13.** FT-IR spectrum of *N,N*-diethyl-7-oxooxepane-4-carboxamide (DECL)

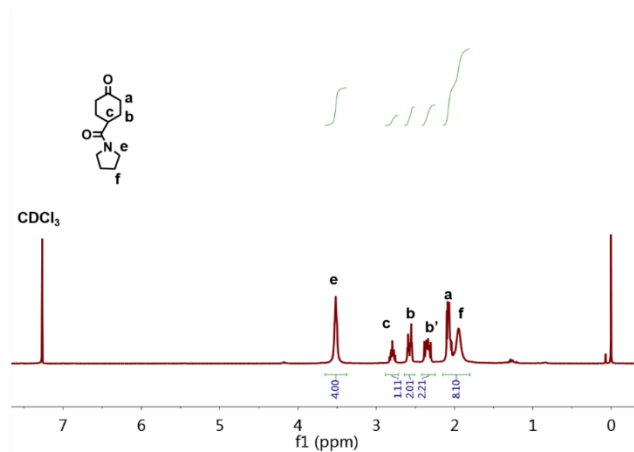

**Figure S14.**  $^1\text{H}$  NMR spectrum of 4-(pyrrolidine-1-carbonyl) cyclohexan-1-one

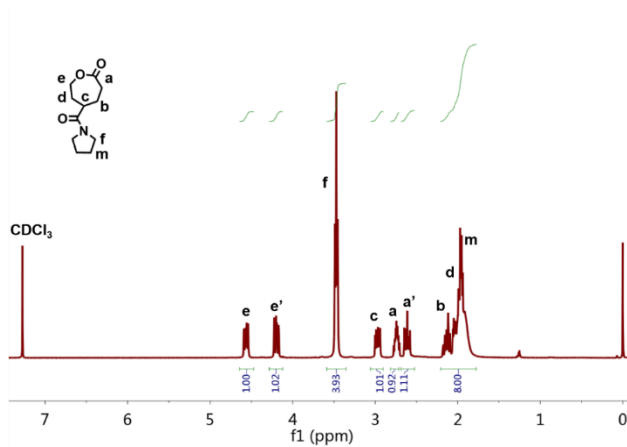

**Figure S15.**  $^1\text{H}$  NMR spectrum of 5-(pyrrolidine-1-carbonyl)oxepan-2-one(VPyCL)

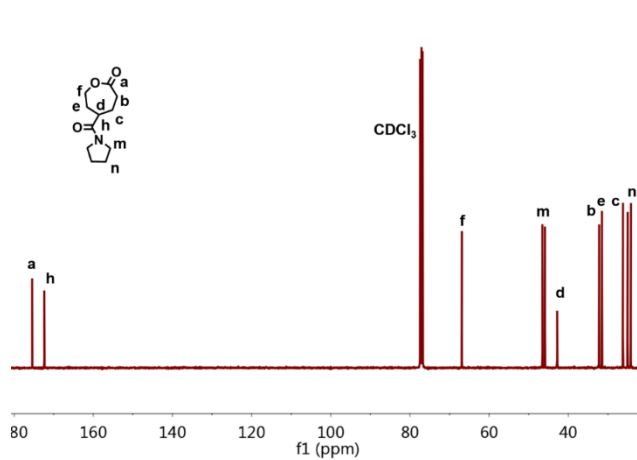

**Figure S16.**  $^{13}\text{C}$  NMR spectrum of 5-(pyrrolidine-1-carbonyl)oxepan-2-one(VPyCL)

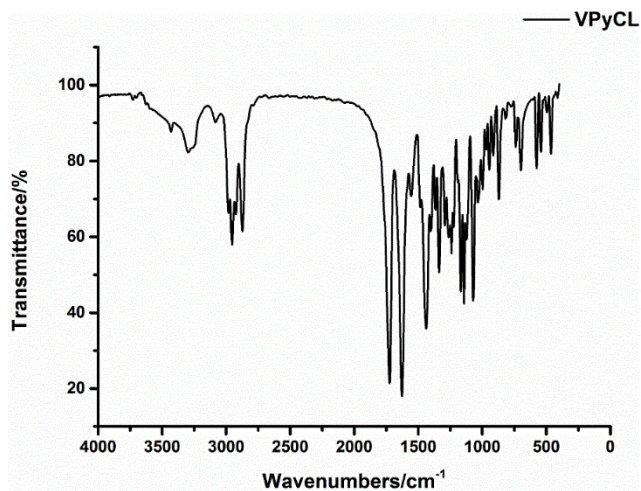

**Figure S17.** FT-IR spectrum of 5-(pyrrolidine-1-carbonyl)oxepan-2-one(VPyCL)

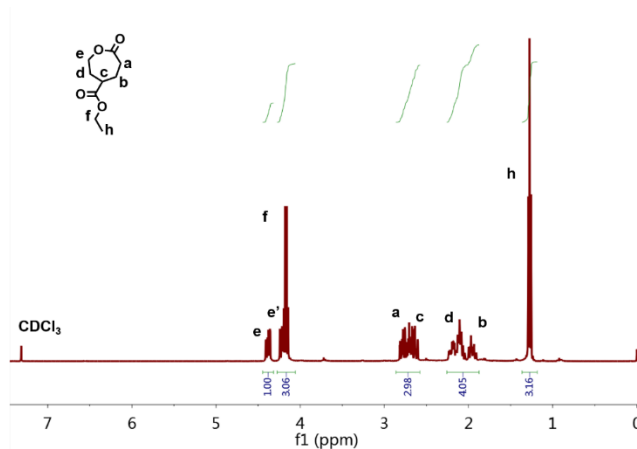

**Figure S18.**  $^1\text{H}$  NMR spectrum of ethyl 7-oxooxepane-4-carboxylate(EMCL)

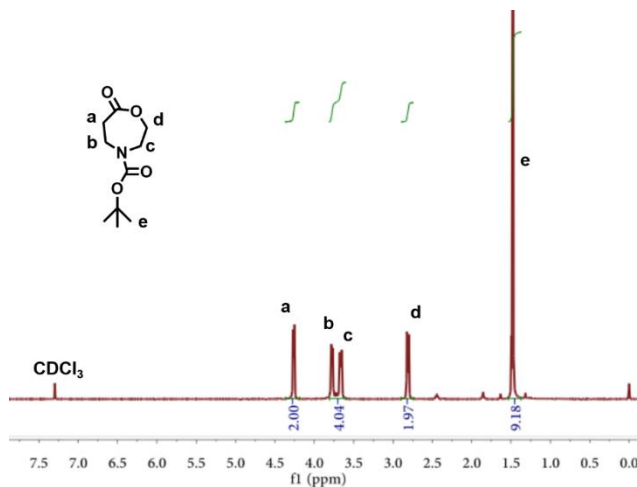

**Figure S19.**  $^1\text{H}$  NMR spectrum of tert-butyl 7-oxo-1,4-oxazepane-4-carboxylate(Boc-NIPIL)

## 2 Computer simulation

All the geometries were fully optimized by means of the hybrid M06-2x<sup>1</sup> functional with the triple-zeta, polarized and diffuse 6-311+G(d,p) basis set.<sup>2</sup> No symmetry or geometry constraint was imposed during the optimizations. All the optimized geometries were corroborated to be factual minima on the potential energy surface via frequency calculations at the same theoretical level. All of these calculations were carried out with the Gaussian 09 suite of programs. All calculations were performed with the SMD solvent model in dichloromethane and the enthalpies were obtained from the frequency calculations at 298.15K and 1 atm. The independent gradient

model (IGM)<sup>3</sup> analysis was performed with the Multiwfn<sup>4</sup> program and visualized by using the VMD package<sup>5</sup>.

## 2.1 The enthalpies of ring opening

The enthalpies of ring opening were evaluated as  $\Delta H_{ro}$  ( $\Delta H_{ro} = H_{ring} - H_{C_3H_6O_2} - H_{chain}$ ), where  $H_{ring}$ ,  $H_{C_3H_6O_2}$  and  $H_{chain}$  are the thermal enthalpies of optimized  $\gamma$ -substituted  $\varepsilon$ -caprolactones, methyl acetate, and methyl acetate-( $\gamma$ -substituted  $\varepsilon$ -caprolactone) adduct.<sup>6</sup>

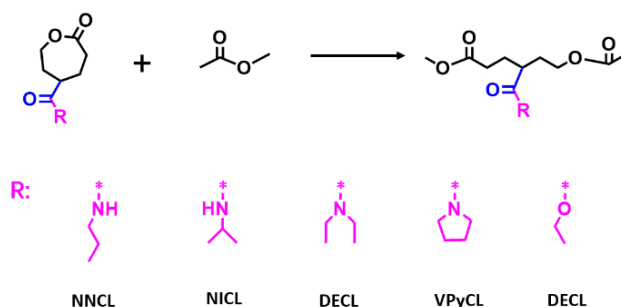

**Scheme S7.** A model of ring-opening reaction between functional  $\varepsilon$ -caprolactone and methyl acetate

## 2.2 The independent gradient model (IGM) analysis

The independent gradient model (IGM) was developed by Lefebvre and coworkers<sup>3</sup> to identify and isolate the interaction between user-defined fragments. They used  $\delta_g = |\rho_{IGM}| - |\rho|$  to describe the interactions. In this work, we applied the  $\delta_g$  analysis to 5 different substituted monomers. Figure S20 shows the 3D real space RGB-colored function isosurfaces and 2D scatter plot of  $\delta_{ginter}$  vs  $\text{sign}(\lambda_2)\rho$ , where  $(\lambda_2)\rho$  is the second eigenvalue of the electron-density Hessian matrix. Blue indicates strong attractive interaction, red the steric repulsion, and green the van der Waals (vdW) interaction.

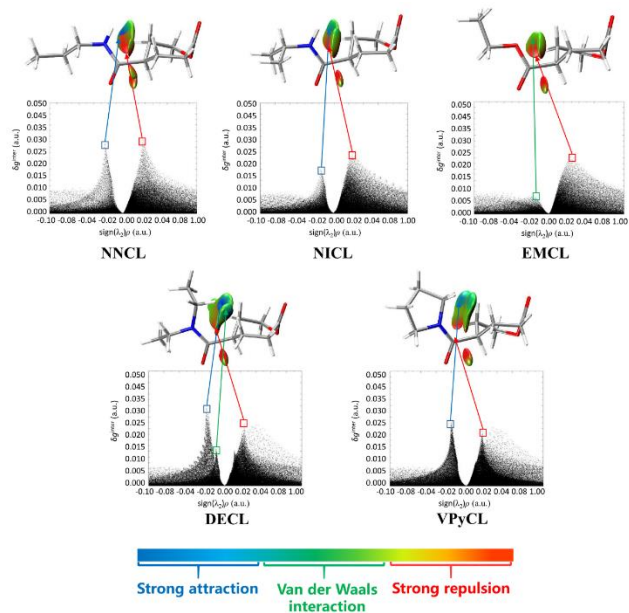

**Figure S20.** The independent gradient model (IGM) analysis of intramolecular interactions between substituted group and ring.

**Table S1** The Result of Computer Simulation

| Entry | Monomer | Attraction/a.u. <sup>a</sup> | Repellant/a.u. <sup>a</sup> | $\Delta H_{ro}$ /kcal/mol <sup>b</sup> |
|-------|---------|------------------------------|-----------------------------|----------------------------------------|
| 1     | NNCL    | 0.030                        | 0.033                       | -16.0                                  |
| 2     | N1CL    | 0.020                        | 0.025                       | -17.6                                  |
| 3     | DECL    | 0.035                        | 0.025                       | -16.6                                  |
| 4     | VPyCL   | 0.027                        | 0.023                       | -17.4                                  |
| 5     | EMCL    | 0.010                        | 0.023                       | -14.7                                  |

<sup>a</sup>Attraction and repellant were calculated through independent gradient model (IGM) analysis from Figure S20. <sup>b</sup> $\Delta H_{ro}$  was calculated through a model of ring opening reaction in Figure S20.

N1CL

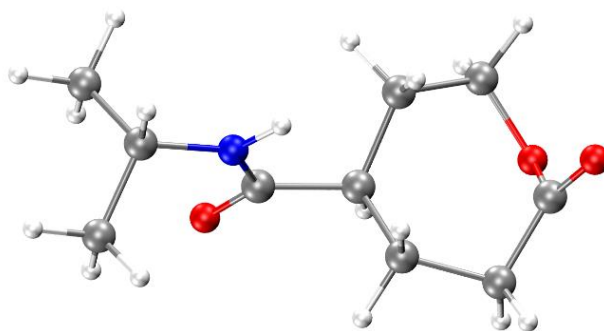

| Center | Atomic | Coordinates (Angstroms) |           |           |
|--------|--------|-------------------------|-----------|-----------|
| Number | Type   | X                       | Y         | Z         |
| -----  |        |                         |           |           |
| 1      | C      | -0.388960               | 0.080596  | 0.574211  |
| 2      | C      | -0.883294               | -1.320254 | 0.141400  |
| 3      | C      | -2.389532               | -1.593912 | 0.354613  |
| 4      | C      | -0.918972               | 1.219309  | -0.328490 |
| 5      | C      | -3.135747               | -0.435038 | -0.233065 |
| 6      | C      | -2.292608               | 1.728357  | 0.106018  |
| 7      | H      | -0.691213               | 0.265278  | 1.608655  |
| 8      | H      | -0.651895               | -1.459915 | -0.919683 |
| 9      | H      | -2.608927               | -1.656365 | 1.421722  |
| 10     | H      | -0.961072               | 0.869463  | -1.366098 |
| 11     | H      | -2.809917               | 2.232611  | -0.713015 |
| 12     | H      | -0.328340               | -2.080920 | 0.696529  |
| 13     | H      | -2.673549               | -2.521100 | -0.141740 |
| 14     | H      | -0.232346               | 2.069970  | -0.309531 |
| 15     | H      | -2.209083               | 2.410165  | 0.951351  |
| 16     | O      | -3.622388               | -0.380001 | -1.328736 |
| 17     | O      | -3.094182               | 0.638561  | 0.603581  |
| 18     | C      | 1.136817                | 0.059276  | 0.608504  |
| 19     | O      | 1.751549                | 0.074024  | 1.668886  |
| 20     | N      | 1.743894                | 0.001186  | -0.597254 |
| 21     | H      | 1.157343                | -0.007048 | -1.419896 |
| 22     | C      | 3.197271                | -0.048635 | -0.808099 |
| 23     | H      | 3.315756                | -0.092459 | -1.893186 |
| 24     | C      | 3.811567                | -1.311397 | -0.207695 |
| 25     | H      | 3.725728                | -1.301704 | 0.879809  |
| 26     | H      | 3.313882                | -2.204704 | -0.592476 |
| 27     | H      | 4.870354                | -1.366890 | -0.472488 |
| 28     | C      | 3.883217                | 1.218177  | -0.301321 |
| 29     | H      | 4.942383                | 1.195873  | -0.569604 |
| 30     | H      | 3.433561                | 2.107091  | -0.750073 |
| 31     | H      | 3.801694                | 1.292798  | 0.784197  |

```

-----
Zero-point correction=          0.269303 (Hartree/Particle)
Thermal correction to Energy=    0.283870
Thermal correction to Enthalpy=   0.284815
Thermal correction to Gibbs Free Energy= 0.227042
Sum of electronic and zero-point Energies= -671.409416
Sum of electronic and thermal Energies= -671.394848
Sum of electronic and thermal Enthalpies= -671.393904
Sum of electronic and thermal Free Energies= -671.451677

```

## EMCL

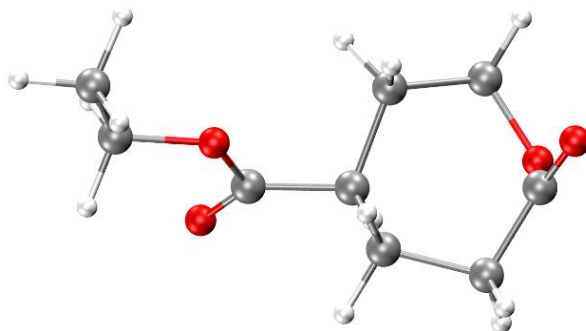

| Center<br>Number | Atomic<br>Type | Coordinates (Angstroms) |           |           |
|------------------|----------------|-------------------------|-----------|-----------|
|                  |                | X                       | Y         | Z         |
| 1                | C              | 0.116292                | -0.671368 | 0.313675  |
| 2                | C              | 0.528621                | 0.494766  | 1.243510  |
| 3                | C              | 2.045269                | 0.627187  | 1.503601  |
| 4                | C              | 0.534197                | -0.455195 | -1.160506 |
| 5                | C              | 2.734419                | 0.582436  | 0.172878  |
| 6                | C              | 1.956999                | -0.936533 | -1.439425 |
| 7                | H              | 0.539571                | -1.607283 | 0.687537  |
| 8                | H              | 0.159123                | 1.426902  | 0.807255  |
| 9                | H              | 2.392598                | -0.209773 | 2.112014  |
| 10               | H              | 0.431959                | 0.605992  | -1.405759 |
| 11               | H              | 2.377786                | -0.450090 | -2.322105 |
| 12               | H              | 0.038301                | 0.369606  | 2.212442  |
| 13               | H              | 2.254241                | 1.569140  | 2.009242  |
| 14               | H              | -0.136570               | -0.999911 | -1.830421 |
| 15               | H              | 1.988347                | -2.016726 | -1.575870 |
| 16               | O              | 3.103557                | 1.522852  | -0.474063 |
| 17               | O              | 2.796441                | -0.696477 | -0.292714 |
| 18               | C              | -1.384293               | -0.833230 | 0.403740  |
| 19               | O              | -1.949101               | -1.785497 | 0.884641  |
| 20               | O              | -2.029395               | 0.217006  | -0.109989 |
| 21               | C              | -3.471186               | 0.172094  | -0.080724 |
| 22               | H              | -3.795624               | 0.070195  | 0.956908  |
| 23               | H              | -3.801406               | -0.709552 | -0.634041 |
| 24               | C              | -3.975407               | 1.450085  | -0.705831 |
| 25               | H              | -5.067291               | 1.446182  | -0.708588 |
| 26               | H              | -3.634903               | 2.319799  | -0.140407 |
| 27               | H              | -3.627610               | 1.540992  | -1.736713 |

Zero-point correction= 0.228938 (Hartree/Particle)

Thermal correction to Energy= 0.241958



Thermal correction to Enthalpy= 0.242902  
 Thermal correction to Gibbs Free Energy= 0.187946  
 Sum of electronic and zero-point Energies= -652.009569  
 Sum of electronic and thermal Energies= -651.996548  
 Sum of electronic and thermal Enthalpies= -651.995604  
 Sum of electronic and thermal Free Energies= -652.050560

DECL

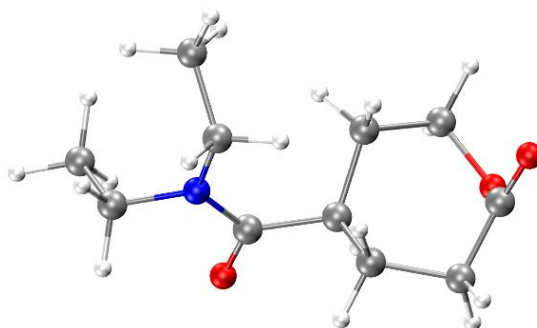

| Center<br>Number | Atomic<br>Type | Coordinates (Angstroms) |           |           |
|------------------|----------------|-------------------------|-----------|-----------|
|                  |                | X                       | Y         | Z         |
| 1                | C              | -0.431900               | -0.655405 | 0.125867  |
| 2                | C              | -1.106774               | -0.729844 | -1.264586 |
| 3                | C              | -2.640368               | -0.932536 | -1.216387 |
| 4                | C              | -0.778702               | 0.624636  | 0.925126  |
| 5                | C              | -3.197669               | 0.067234  | -0.245883 |
| 6                | C              | -2.038073               | 0.435556  | 1.769067  |
| 7                | H              | -0.797278               | -1.509595 | 0.702093  |
| 8                | H              | -0.900823               | 0.180073  | -1.834346 |
| 9                | H              | -2.869297               | -1.938065 | -0.859472 |
| 10               | H              | -0.928441               | 1.472763  | 0.251350  |
| 11               | H              | -2.470743               | 1.395050  | 2.060964  |
| 12               | H              | -0.680949               | -1.566947 | -1.823196 |
| 13               | H              | -3.069523               | -0.779798 | -2.205995 |
| 14               | H              | 0.040274                | 0.893676  | 1.597602  |
| 15               | H              | -1.832715               | -0.153913 | 2.662069  |
| 16               | O              | -3.662914               | 1.139804  | -0.516519 |
| 17               | O              | -3.008546               | -0.344732 | 1.039373  |
| 18               | C              | 1.065479                | -0.968070 | 0.023678  |
| 19               | O              | 1.450436                | -2.081847 | 0.379428  |
| 20               | N              | 1.947438                | -0.053670 | -0.451288 |
| 21               | C              | 4.011120                | -0.384021 | 0.908396  |
| 22               | H              | 5.066140                | -0.660314 | 0.836528  |

|    |   |          |           |           |
|----|---|----------|-----------|-----------|
| 23 | H | 3.946954 | 0.618822  | 1.336385  |
| 24 | H | 3.518479 | -1.085279 | 1.583496  |
| 25 | C | 1.625415 | 1.266622  | -0.988322 |
| 26 | H | 2.043320 | 1.325032  | -1.998733 |
| 27 | H | 0.550493 | 1.362075  | -1.090592 |
| 28 | C | 2.173108 | 2.408013  | -0.139806 |
| 29 | H | 1.876406 | 3.364618  | -0.576729 |
| 30 | H | 1.784967 | 2.357223  | 0.880131  |
| 31 | H | 3.264377 | 2.383006  | -0.096673 |
| 32 | C | 3.364720 | -0.432872 | -0.471288 |
| 33 | H | 3.869112 | 0.254675  | -1.153111 |
| 34 | H | 3.447249 | -1.439090 | -0.886193 |

-----

Zero-point correction= 0.298970 (Hartree/Particle)

Thermal correction to Energy= 0.314359

Thermal correction to Enthalpy= 0.315303

Thermal correction to Gibbs Free Energy= 0.256692

Sum of electronic and zero-point Energies= -710.670308

Sum of electronic and thermal Energies= -710.654919

Sum of electronic and thermal Enthalpies= -710.653975

Sum of electronic and thermal Free Energies= -710.712586

VPyCL

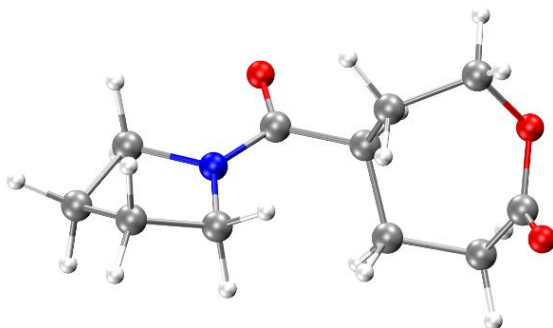

| Center<br>Number | Atomic<br>Type | Coordinates (Angstroms) |           |           |
|------------------|----------------|-------------------------|-----------|-----------|
|                  |                | X                       | Y         | Z         |
| -----            |                |                         |           |           |
| 1                | C              | -0.529083               | 0.700134  | 0.229446  |
| 2                | C              | -0.876286               | -0.394597 | 1.261699  |
| 3                | C              | -2.385893               | -0.500384 | 1.581625  |
| 4                | C              | -0.980150               | 0.343364  | -1.210408 |
| 5                | C              | -3.111584               | -0.591522 | 0.271287  |
| 6                | C              | -2.410989               | 0.804362  | -1.489043 |
| 7                | H              | -1.052399               | 1.613891  | 0.523466  |

|    |   |           |           |           |
|----|---|-----------|-----------|-----------|
| 8  | H | -0.539833 | -1.368774 | 0.900975  |
| 9  | H | -2.717806 | 0.393405  | 2.112710  |
| 10 | H | -0.914040 | -0.737190 | -1.365484 |
| 11 | H | -2.849528 | 0.261305  | -2.329190 |
| 12 | H | -0.351136 | -0.192081 | 2.198757  |
| 13 | H | -2.580643 | -1.388017 | 2.182449  |
| 14 | H | -0.326738 | 0.813191  | -1.950749 |
| 15 | H | -2.448776 | 1.873958  | -1.692029 |
| 16 | O | -3.468639 | -1.598393 | -0.275434 |
| 17 | O | -3.225931 | 0.635288  | -0.310486 |
| 18 | C | 0.937488  | 1.126470  | 0.281133  |
| 19 | O | 1.211745  | 2.314831  | 0.455706  |
| 20 | C | 1.817637  | -1.222661 | -0.163595 |
| 21 | C | 4.118538  | -0.638210 | 0.036423  |
| 22 | C | 3.182187  | -1.538783 | -0.771935 |
| 23 | H | 0.992982  | -1.433683 | -0.841490 |
| 24 | H | 1.672699  | -1.791171 | 0.760714  |
| 25 | H | 5.086552  | -0.480892 | -0.439061 |
| 26 | H | 4.286681  | -1.073746 | 1.025343  |
| 27 | H | 3.193361  | -1.244600 | -1.825393 |
| 28 | H | 3.427391  | -2.598610 | -0.701671 |
| 29 | N | 1.920115  | 0.214793  | 0.130568  |
| 30 | C | 3.322942  | 0.660499  | 0.165358  |
| 31 | H | 3.524844  | 1.204408  | 1.089198  |
| 32 | H | 3.509339  | 1.339214  | -0.672752 |

```

-----
Zero-point correction=          0.278608 (Hartree/Particle)
Thermal correction to Energy=    0.292344
Thermal correction to Enthalpy=  0.293288
Thermal correction to Gibbs Free Energy=  0.237662
Sum of electronic and zero-point Energies=  -709.492889
Sum of electronic and thermal Energies=    -709.479153
Sum of electronic and thermal Enthalpies=   -709.478209
Sum of electronic and thermal Free Energies= -709.533835

```

Ring opened NNCL

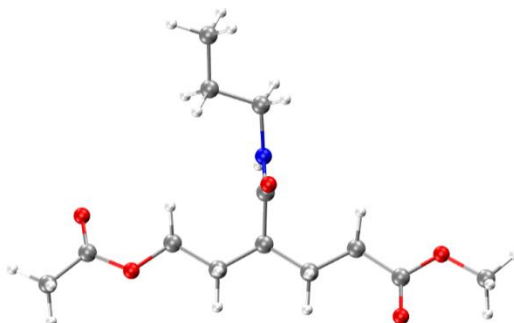

| Center<br>Number | Atomic<br>Type | Coordinates (Angstroms) |           |           |
|------------------|----------------|-------------------------|-----------|-----------|
|                  |                | X                       | Y         | Z         |
| 1                | C              | 6.514454                | -0.426702 | -0.074363 |
| 2                | H              | 6.734720                | -1.361509 | -0.591461 |
| 3                | H              | 7.166906                | 0.365712  | -0.433297 |
| 4                | H              | 6.641392                | -0.563463 | 1.000171  |
| 5                | O              | 5.180156                | 0.004521  | -0.368879 |
| 6                | C              | 4.198324                | -0.827699 | -0.002823 |
| 7                | O              | 4.402702                | -1.880688 | 0.548032  |
| 8                | C              | 2.845744                | -0.280409 | -0.374409 |
| 9                | H              | 2.777981                | 0.733958  | 0.032124  |
| 10               | H              | 2.825189                | -0.176709 | -1.465079 |
| 11               | C              | 1.701535                | -1.157296 | 0.115500  |
| 12               | H              | 1.830800                | -2.175522 | -0.259925 |
| 13               | H              | 1.716353                | -1.209573 | 1.207400  |
| 14               | C              | 0.336017                | -0.635952 | -0.340075 |
| 15               | H              | 0.316204                | -0.599298 | -1.435527 |
| 16               | C              | -0.788075               | -1.556169 | 0.149957  |
| 17               | H              | -0.612695               | -2.565844 | -0.231744 |
| 18               | H              | -0.765751               | -1.599594 | 1.242733  |
| 19               | C              | -2.149163               | -1.076116 | -0.310577 |
| 20               | H              | -2.203433               | -1.010931 | -1.401167 |
| 21               | H              | -2.396756               | -0.095353 | 0.105353  |
| 22               | O              | -3.120656               | -2.030110 | 0.149915  |
| 23               | C              | -4.400023               | -1.772462 | -0.150438 |
| 24               | C              | -5.317017               | -2.822079 | 0.400957  |
| 25               | H              | -6.344092               | -2.594189 | 0.125773  |
| 26               | H              | -5.030556               | -3.800397 | 0.010778  |
| 27               | H              | -5.218957               | -2.853418 | 1.487863  |
| 28               | O              | -4.740939               | -0.805444 | -0.786717 |
| 29               | C              | 0.109102                | 0.769669  | 0.208648  |
| 30               | O              | 0.147755                | 0.998722  | 1.412333  |
| 31               | N              | -0.132807               | 1.730381  | -0.708647 |
| 32               | H              | -0.210479               | 1.459910  | -1.678509 |

|    |   |           |          |           |
|----|---|-----------|----------|-----------|
| 33 | C | -0.462827 | 3.097902 | -0.334169 |
| 34 | H | -0.207928 | 3.744430 | -1.176751 |
| 35 | H | 0.171241  | 3.378404 | 0.510126  |
| 36 | C | -1.933373 | 3.267675 | 0.040819  |
| 37 | H | -2.553731 | 2.966246 | -0.809496 |
| 38 | H | -2.162784 | 2.589387 | 0.867974  |
| 39 | C | -2.243400 | 4.707198 | 0.437292  |
| 40 | H | -2.017924 | 5.396358 | -0.381785 |
| 41 | H | -3.297416 | 4.827899 | 0.695773  |
| 42 | H | -1.648566 | 5.009467 | 1.303815  |

```

-----
Zero-point correction=          0.361409 (Hartree/Particle)
Thermal correction to Energy=    0.384168
Thermal correction to Enthalpy=  0.385112
Thermal correction to Gibbs Free Energy=  0.304053
Sum of electronic and zero-point Energies=  -939.705802
Sum of electronic and thermal Energies=    -939.683042
Sum of electronic and thermal Enthalpies=  -939.682098
Sum of electronic and thermal Free Energies= -939.763157

```

## Ring opened NI<sub>2</sub>L

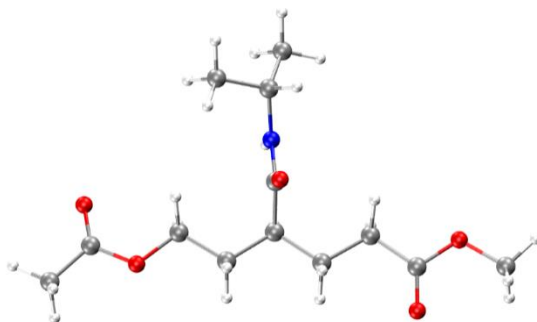

```

-----

```

| Center<br>Number | Atomic<br>Type | Coordinates (Angstroms) |   |   |
|------------------|----------------|-------------------------|---|---|
|                  |                | X                       | Y | Z |

```

-----

```

|   |   |          |           |           |
|---|---|----------|-----------|-----------|
| 1 | C | 6.350386 | -0.861436 | -0.069547 |
| 2 | H | 6.518342 | -1.676360 | -0.774649 |
| 3 | H | 7.062372 | -0.058636 | -0.244972 |
| 4 | H | 6.444598 | -1.234037 | 0.950931  |
| 5 | O | 5.054546 | -0.284766 | -0.273135 |
| 6 | C | 4.011675 | -1.103274 | -0.090843 |
| 7 | O | 4.133939 | -2.259206 | 0.229825  |
| 8 | C | 2.705992 | -0.398590 | -0.348178 |
| 9 | H | 2.727268 | 0.550250  | 0.196402  |

|    |   |           |           |           |
|----|---|-----------|-----------|-----------|
| 10 | H | 2.683642  | -0.143749 | -1.414082 |
| 11 | C | 1.498383  | -1.241469 | 0.039580  |
| 12 | H | 1.538945  | -2.203266 | -0.477466 |
| 13 | H | 1.522305  | -1.448177 | 1.112974  |
| 14 | C | 0.174373  | -0.554976 | -0.305097 |
| 15 | H | 0.139627  | -0.368743 | -1.384563 |
| 16 | C | -1.013116 | -1.441947 | 0.086925  |
| 17 | H | -0.913938 | -2.408503 | -0.415122 |
| 18 | H | -0.988506 | -1.619834 | 1.165895  |
| 19 | C | -2.338840 | -0.815789 | -0.294173 |
| 20 | H | -2.391251 | -0.611267 | -1.367450 |
| 21 | H | -2.520820 | 0.119391  | 0.243171  |
| 22 | O | -3.370592 | -1.754123 | 0.054099  |
| 23 | C | -4.629833 | -1.386018 | -0.214675 |
| 24 | C | -5.611587 | -2.439674 | 0.200930  |
| 25 | H | -6.622319 | -2.112923 | -0.031716 |
| 26 | H | -5.388882 | -3.371632 | -0.322142 |
| 27 | H | -5.514316 | -2.625350 | 1.272249  |
| 28 | O | -4.907466 | -0.330721 | -0.729480 |
| 29 | C | 0.072839  | 0.777404  | 0.431163  |
| 30 | O | 0.185485  | 0.843000  | 1.650707  |
| 31 | N | -0.147535 | 1.861758  | -0.340376 |
| 32 | H | -0.276472 | 1.728463  | -1.334593 |
| 33 | C | -0.346855 | 3.202472  | 0.211209  |
| 34 | H | 0.389444  | 3.324346  | 1.009511  |
| 35 | C | -0.087066 | 4.225756  | -0.885135 |
| 36 | H | -0.803064 | 4.098574  | -1.703448 |
| 37 | H | -0.203500 | 5.236320  | -0.489239 |
| 38 | H | 0.923814  | 4.124810  | -1.286747 |
| 39 | C | -1.747982 | 3.340933  | 0.801159  |
| 40 | H | -1.875828 | 4.330529  | 1.247281  |
| 41 | H | -2.502170 | 3.213998  | 0.018567  |
| 42 | H | -1.914054 | 2.589655  | 1.575808  |

```

-----
Zero-point correction=          0.360763 (Hartree/Particle)
Thermal correction to Energy=    0.383526
Thermal correction to Enthalpy=   0.384470
Thermal correction to Gibbs Free Energy=  0.304048
Sum of electronic and zero-point Energies= -939.709612
Sum of electronic and thermal Energies= -939.686849
Sum of electronic and thermal Enthalpies= -939.685905
Sum of electronic and thermal Free Energies= -939.766327

```

Ring opened EMCL

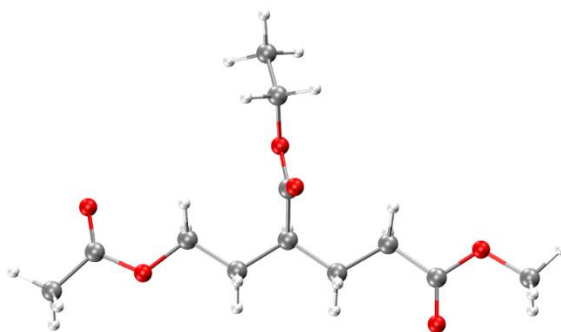

| Center<br>Number | Atomic<br>Type | Coordinates (Angstroms) |           |           |
|------------------|----------------|-------------------------|-----------|-----------|
|                  |                | X                       | Y         | Z         |
| 1                | C              | 6.292044                | -0.744815 | -0.141251 |
| 2                | H              | 6.431415                | -1.543325 | -0.870861 |
| 3                | H              | 7.015326                | 0.049475  | -0.308769 |
| 4                | H              | 6.398120                | -1.146367 | 0.866997  |
| 5                | O              | 5.003423                | -0.139460 | -0.304849 |
| 6                | C              | 3.949813                | -0.944462 | -0.128555 |
| 7                | O              | 4.055223                | -2.110065 | 0.161414  |
| 8                | C              | 2.652764                | -0.212343 | -0.350808 |
| 9                | H              | 2.692236                | 0.716680  | 0.226761  |
| 10               | H              | 2.624752                | 0.080385  | -1.406474 |
| 11               | C              | 1.436737                | -1.053203 | 0.015031  |
| 12               | H              | 1.455255                | -1.990782 | -0.545256 |
| 13               | H              | 1.466849                | -1.309473 | 1.077643  |
| 14               | C              | 0.121630                | -0.333548 | -0.291907 |
| 15               | H              | 0.085351                | -0.066397 | -1.351848 |
| 16               | C              | -1.081277               | -1.224161 | 0.049771  |
| 17               | H              | -1.001648               | -2.151536 | -0.523535 |
| 18               | H              | -1.049796               | -1.481938 | 1.112719  |
| 19               | C              | -2.400434               | -0.550061 | -0.270011 |
| 20               | H              | -2.464332               | -0.272631 | -1.325767 |
| 21               | H              | -2.559423               | 0.350146  | 0.331082  |
| 22               | O              | -3.441083               | -1.493432 | 0.032804  |
| 23               | C              | -4.700067               | -1.074020 | -0.151545 |
| 24               | C              | -5.692511               | -2.146139 | 0.183068  |
| 25               | H              | -6.701700               | -1.748842 | 0.104328  |
| 26               | H              | -5.566840               | -2.978746 | -0.512458 |
| 27               | H              | -5.509791               | -2.520287 | 1.191529  |
| 28               | O              | -4.968870               | 0.033364  | -0.546916 |
| 29               | C              | 0.024987                | 0.946434  | 0.515796  |
| 30               | O              | 0.184046                | 1.007987  | 1.711144  |
| 31               | O              | -0.284034               | 2.002656  | -0.238381 |
| 32               | C              | -0.461223               | 3.259318  | 0.450467  |

|    |   |           |          |           |
|----|---|-----------|----------|-----------|
| 33 | H | -1.243796 | 3.134137 | 1.201930  |
| 34 | H | 0.471176  | 3.509503 | 0.960785  |
| 35 | C | -0.833811 | 4.291902 | -0.585163 |
| 36 | H | -1.760966 | 4.015933 | -1.091314 |
| 37 | H | -0.980645 | 5.258063 | -0.098062 |
| 38 | H | -0.043087 | 4.398191 | -1.330513 |

|                                              |                             |
|----------------------------------------------|-----------------------------|
| Zero-point correction=                       | 0.320791 (Hartree/Particle) |
| Thermal correction to Energy=                | 0.341842                    |
| Thermal correction to Enthalpy=              | 0.342786                    |
| Thermal correction to Gibbs Free Energy=     | 0.266462                    |
| Sum of electronic and zero-point Energies=   | -920.304958                 |
| Sum of electronic and thermal Energies=      | -920.283908                 |
| Sum of electronic and thermal Enthalpies=    | -920.282963                 |
| Sum of electronic and thermal Free Energies= | -920.359287                 |

Ring opened DECL

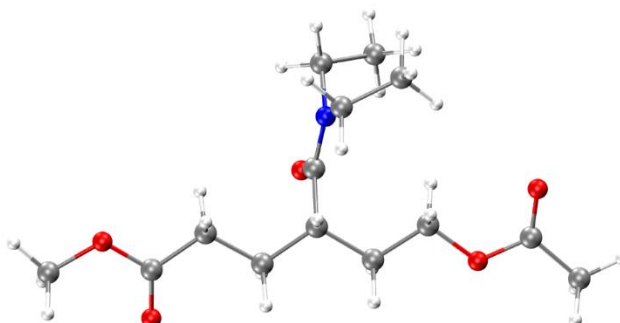

| Center<br>Number | Atomic<br>Type | Coordinates (Angstroms) |           |           |
|------------------|----------------|-------------------------|-----------|-----------|
|                  |                | X                       | Y         | Z         |
| 1                | 0              | -6.529620               | -0.585574 | 0.216445  |
| 2                | 0              | -6.696228               | -1.511631 | 0.768022  |
| 3                | 0              | -7.198315               | 0.192761  | 0.576320  |
| 4                | 0              | -6.690138               | -0.759494 | -0.848246 |
| 5                | 0              | -5.202965               | -0.096461 | 0.447084  |
| 6                | 0              | -4.203708               | -0.905693 | 0.074834  |
| 7                | 0              | -4.388580               | -1.992042 | -0.415027 |
| 8                | 0              | -2.860430               | -0.282668 | 0.346124  |
| 9                | 0              | -2.832441               | 0.671554  | -0.190686 |
| 10               | 0              | -2.818853               | -0.039741 | 1.413387  |
| 11               | 0              | -1.700337               | -1.178870 | -0.064776 |
| 12               | 0              | -1.774446               | -2.138112 | 0.454407  |
| 13               | 0              | -1.751016               | -1.380821 | -1.136633 |
| 14               | 0              | -0.344216               | -0.550041 | 0.268399  |



|    |   |           |           |           |
|----|---|-----------|-----------|-----------|
| 15 | 0 | -0.306314 | -0.394040 | 1.346085  |
| 16 | 0 | 0.797360  | -1.495270 | -0.133506 |
| 17 | 0 | 0.665040  | -2.448723 | 0.385526  |
| 18 | 0 | 0.742957  | -1.688092 | -1.208995 |
| 19 | 0 | 2.157263  | -0.923812 | 0.209775  |
| 20 | 0 | 2.242637  | -0.702320 | 1.278112  |
| 21 | 0 | 2.368276  | -0.007801 | -0.349340 |
| 22 | 0 | 3.140762  | -1.911636 | -0.141118 |
| 23 | 0 | 4.419879  | -1.579248 | 0.074404  |
| 24 | 0 | 5.352148  | -2.676733 | -0.342052 |
| 25 | 0 | 6.379452  | -2.383810 | -0.138636 |
| 26 | 0 | 5.107057  | -3.590631 | 0.202232  |
| 27 | 0 | 5.223632  | -2.876600 | -1.407621 |
| 28 | 0 | 4.749230  | -0.518259 | 0.545688  |
| 29 | 0 | -0.192859 | 0.762908  | -0.504166 |
| 30 | 0 | -0.481502 | 0.770240  | -1.700873 |
| 31 | 0 | 0.263876  | 1.885837  | 0.105484  |
| 32 | 0 | 1.585024  | 3.102188  | -1.628600 |
| 33 | 0 | 1.603277  | 4.020001  | -2.221970 |
| 34 | 0 | 2.508075  | 3.051473  | -1.047646 |
| 35 | 0 | 1.553282  | 2.252862  | -2.312712 |
| 36 | 0 | 0.359211  | 3.095175  | -0.721347 |
| 37 | 0 | 0.378512  | 3.948964  | -0.041064 |
| 38 | 0 | -0.547425 | 3.166178  | -1.324444 |
| 39 | 0 | 0.652584  | 2.037018  | 1.509920  |
| 40 | 0 | -0.012712 | 2.778649  | 1.965105  |
| 41 | 0 | 0.496011  | 1.100019  | 2.034542  |
| 42 | 0 | 2.102972  | 2.474982  | 1.685987  |
| 43 | 0 | 2.283142  | 3.459945  | 1.249964  |
| 44 | 0 | 2.330839  | 2.536944  | 2.752892  |
| 45 | 0 | 2.791388  | 1.760701  | 1.228340  |

```

-----
Zero-point correction=          0.390001 (Hartree/Particle)
Thermal correction to Energy=    0.413715
Thermal correction to Enthalpy=  0.414659
Thermal correction to Gibbs Free Energy=  0.333214
Sum of electronic and zero-point Energies= -978.969020
Sum of electronic and thermal Energies= -978.945306
Sum of electronic and thermal Enthalpies= -978.944362
Sum of electronic and thermal Free Energies= -979.025808

```

Ring opened VPyCL

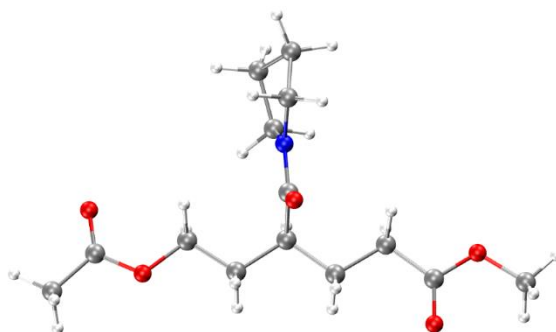

| Center<br>Number | Atomic<br>Type | Coordinates (Angstroms) |           |           |
|------------------|----------------|-------------------------|-----------|-----------|
|                  |                | X                       | Y         | Z         |
| 1                | C              | 6.296222                | -1.055846 | -0.396577 |
| 2                | H              | 6.337697                | -1.941847 | -1.031056 |
| 3                | H              | 7.003742                | -0.307927 | -0.746540 |
| 4                | H              | 6.517354                | -1.332802 | 0.634976  |
| 5                | O              | 5.004936                | -0.440554 | -0.482547 |
| 6                | C              | 3.965297                | -1.202557 | -0.121825 |
| 7                | O              | 4.087205                | -2.341259 | 0.255240  |
| 8                | C              | 2.663684                | -0.456978 | -0.250397 |
| 9                | H              | 2.715373                | 0.400151  | 0.430666  |
| 10               | H              | 2.615736                | -0.045355 | -1.263824 |
| 11               | C              | 1.453939                | -1.331961 | 0.048804  |
| 12               | H              | 1.468093                | -2.210900 | -0.601198 |
| 13               | H              | 1.498787                | -1.688757 | 1.080475  |
| 14               | C              | 0.134023                | -0.585470 | -0.167886 |
| 15               | H              | 0.097387                | -0.243598 | -1.205425 |
| 16               | C              | -1.058523               | -1.512876 | 0.097615  |
| 17               | H              | -0.946375               | -2.419454 | -0.503802 |
| 18               | H              | -1.055776               | -1.806547 | 1.151374  |
| 19               | C              | -2.377477               | -0.850968 | -0.243851 |
| 20               | H              | -2.431144               | -0.592417 | -1.304787 |
| 21               | H              | -2.544927               | 0.058426  | 0.342009  |
| 22               | O              | -3.421659               | -1.791834 | 0.058267  |
| 23               | C              | -4.673878               | -1.403535 | -0.213962 |
| 24               | C              | -5.669816               | -2.463778 | 0.147402  |
| 25               | H              | -6.673344               | -2.124594 | -0.098158 |
| 26               | H              | -5.439498               | -3.381490 | -0.396982 |
| 27               | H              | -5.598126               | -2.680478 | 1.214953  |
| 28               | O              | -4.936260               | -0.326792 | -0.691340 |
| 29               | C              | 0.069277                | 0.606841  | 0.785452  |
| 30               | O              | 0.231161                | 0.437704  | 1.994215  |
| 31               | C              | -0.461242               | 2.181563  | -1.126027 |
| 32               | C              | -0.212409               | 4.178465  | 0.173545  |

|    |   |           |          |           |
|----|---|-----------|----------|-----------|
| 33 | C | -0.997246 | 3.609144 | -1.010151 |
| 34 | H | -1.195378 | 1.498703 | -1.553970 |
| 35 | H | 0.448978  | 2.150524 | -1.733859 |
| 36 | H | -0.670165 | 5.066932 | 0.608196  |
| 37 | H | 0.804853  | 4.430660 | -0.138814 |
| 38 | H | -2.063737 | 3.580850 | -0.769945 |
| 39 | H | -0.864153 | 4.171462 | -1.934276 |
| 40 | N | -0.155929 | 1.831134 | 0.272514  |
| 41 | C | -0.178640 | 3.007431 | 1.153333  |
| 42 | H | 0.696598  | 3.004391 | 1.803833  |
| 43 | H | -1.072790 | 2.981156 | 1.785028  |

```

-----
Zero-point correction=          0.369901 (Hartree/Particle)
Thermal correction to Energy=    0.391913
Thermal correction to Enthalpy=   0.392857
Thermal correction to Gibbs Free Energy= 0.315026
Sum of electronic and zero-point Energies= -977.792852
Sum of electronic and thermal Energies= -977.770840
Sum of electronic and thermal Enthalpies= -977.769895
Sum of electronic and thermal Free Energies= -977.847726

```

## Methyl acetate

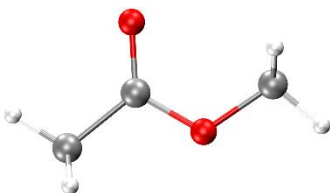

| Center<br>Number | Atomic<br>Type | Coordinates (Angstroms) |           |           |
|------------------|----------------|-------------------------|-----------|-----------|
|                  |                | X                       | Y         | Z         |
| 1                | C              | 1.866895                | -0.161842 | 0.000129  |
| 2                | H              | 2.541379                | -1.014646 | 0.000270  |
| 3                | H              | 2.025507                | 0.446057  | -0.891175 |
| 4                | H              | 2.025414                | 0.446279  | 0.891300  |
| 5                | O              | 0.544351                | -0.712263 | 0.000129  |
| 6                | C              | -0.461452               | 0.171100  | -0.000053 |
| 7                | O              | -0.283171               | 1.364221  | -0.000209 |
| 8                | C              | -1.794989               | -0.513011 | -0.000027 |
| 9                | H              | -1.877616               | -1.150450 | -0.882247 |
| 10               | H              | -1.877739               | -1.150130 | 0.882413  |
| 11               | H              | -2.589113               | 0.229737  | -0.000215 |

|                                              |                             |
|----------------------------------------------|-----------------------------|
| Zero-point correction=                       | 0.090311 (Hartree/Particle) |
| Thermal correction to Energy=                | 0.096468                    |
| Thermal correction to Enthalpy=              | 0.097412                    |
| Thermal correction to Gibbs Free Energy=     | 0.059269                    |
| Sum of electronic and zero-point Energies=   | -268.271015                 |
| Sum of electronic and thermal Energies=      | -268.264858                 |
| Sum of electronic and thermal Enthalpies=    | -268.263913                 |
| Sum of electronic and thermal Free Energies= | -268.302057                 |

**Table S2.** Results for ROP of  $\gamma$ -amide- $\epsilon$ -caprolactones<sup>a</sup>

| Entry | Monomer | Catalyst <sup>b</sup> | [M] <sub>0</sub> /[I] <sub>0</sub> | Time/h | Reaction temperature/°C | Conversion/% <sup>c</sup> | $M_n$ /Da <sup>c</sup> | $M_n$ /Da <sup>d</sup> | $D^d$          |
|-------|---------|-----------------------|------------------------------------|--------|-------------------------|---------------------------|------------------------|------------------------|----------------|
| 1     | NNCL    | Sn(Oct) <sub>2</sub>  | 40                                 | 24     | 130                     | 30                        | 2500                   | 3400                   | — <sup>e</sup> |
| 2     | NNCL    | DBU/TU                | 40                                 | 48     | 25                      | 9                         | 700                    | —                      | —              |
| 3     | NICL    | Sn(Oct) <sub>2</sub>  | 40                                 | 24     | 165                     | 49                        | 5200                   | 2400                   | — <sup>e</sup> |
| 4     | NICL    | DBU/TU                | 40                                 | 48     | 25                      | 17                        | 1500                   | —                      | —              |
| 5     | DECL    | Sn(Oct) <sub>2</sub>  | 40                                 | 24     | 130                     | 20                        | 1800                   | 2200                   | — <sup>e</sup> |
| 6     | DECL    | DBU/TU                | 40                                 | 48     | 25                      | 15                        | 1400                   | —                      | —              |
| 7     | VPyCL   | Sn(Oct) <sub>2</sub>  | 40                                 | 24     | 130                     | 51                        | 4400                   | 1800                   | — <sup>e</sup> |
| 8     | VPyCL   | DBU/TU                | 40                                 | 48     | 25                      | 16                        | 1500                   | —                      | —              |

<sup>a</sup>All reactions used benzyl alcohol (BnOH) as the initiator. <sup>b</sup>Sn(Oct)<sub>2</sub>:5wt%(relative to the monomer weight), DBU/TU:10mol%(relative to the monomer mole mass). <sup>c</sup>Conversion and number average molecular weight ( $M_n$ ) were calculated by <sup>1</sup>H NMR. <sup>d</sup> $M_n$  and dispersity ( $D$ ) were measured by GPC in DMF using polymethyl methacrylate (PMMA) standards as calibration. <sup>e</sup>The GPC curves showed multiple peaks.

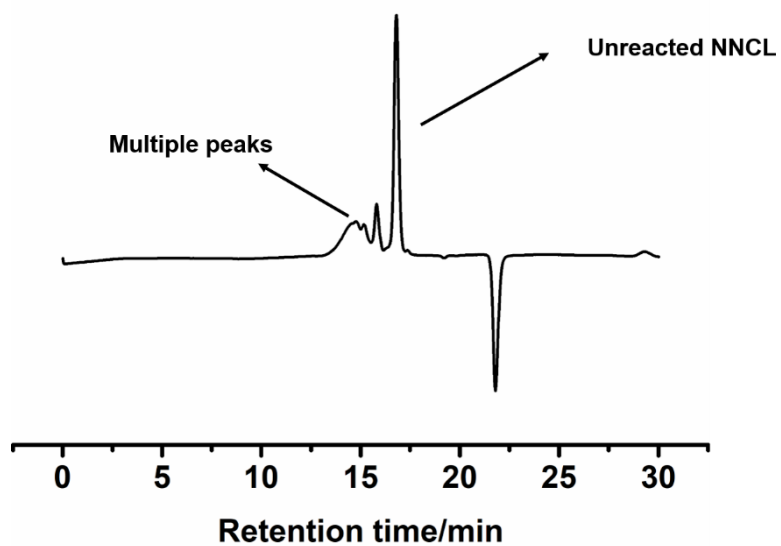

**Figure S21.** GPC curve of crude PNNCL<sub>40</sub> after reaction for 3.5h.

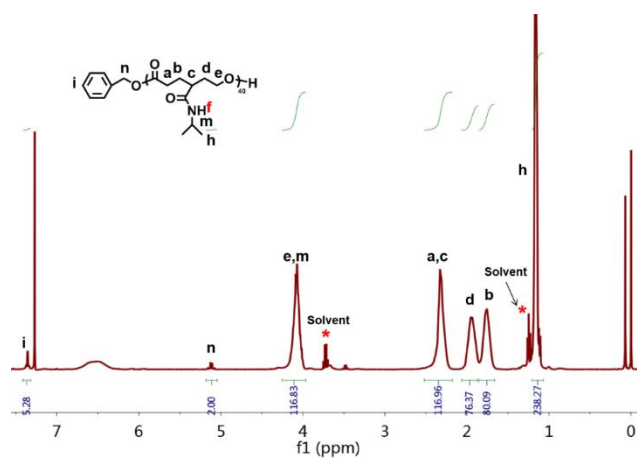

**Figure S22.** <sup>1</sup>H NMR spectrum of poly(*N*-isopropyl-4-oxocyclohexane-1-carboxamide)<sub>40</sub> (PNICL<sub>40</sub>)

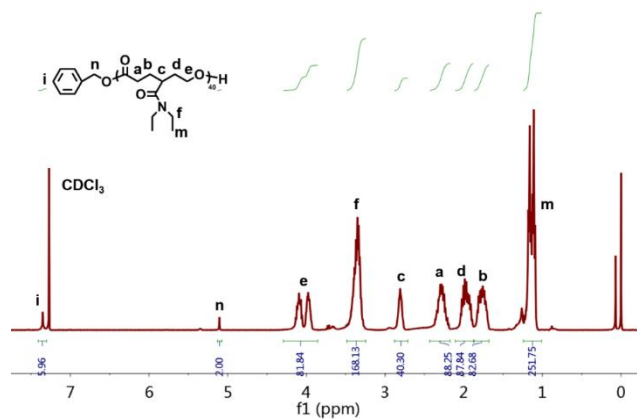

**Figure S23.** <sup>1</sup>H NMR spectrum of poly(*N,N*-diethyl-7-oxooxepane-4-carboxamide)<sub>40</sub> (PDECL)<sub>40</sub>

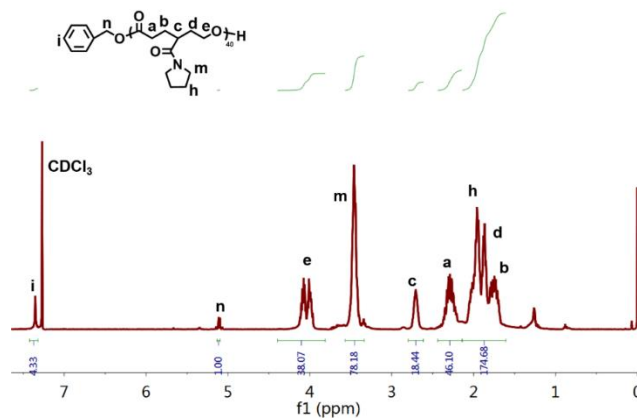

**Figure S24.** <sup>1</sup>H NMR spectrum of poly(5-(pyrrolidine-1-carbonyl)oxepan-2-one)<sub>40</sub> (PVPyCL)<sub>40</sub>

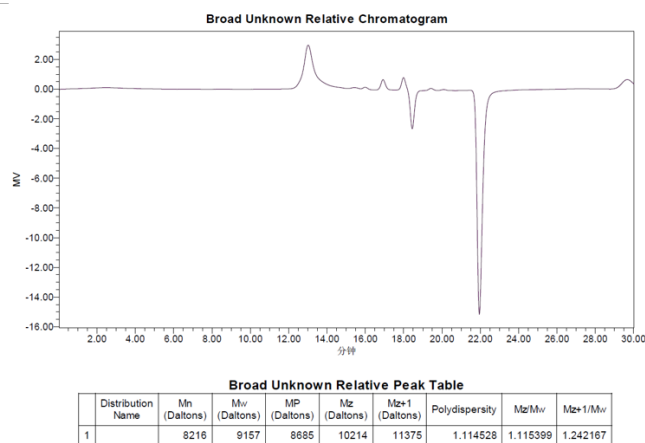

**Figure S25.** GPC curve of crude PNICL<sub>40</sub>.  $M_n=8216$ ,  $D=1.14528$

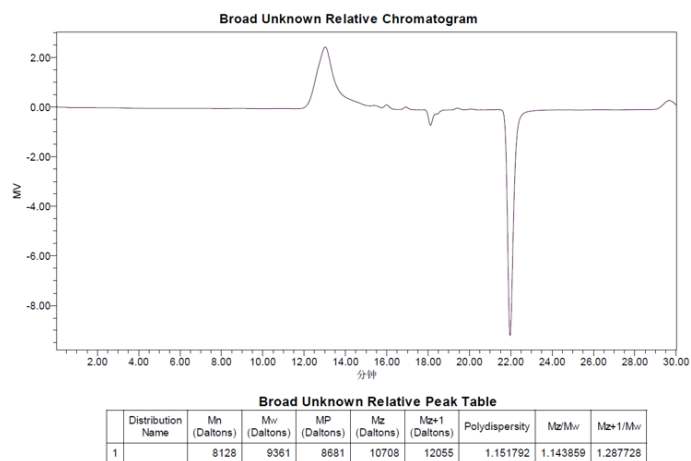

Figure S26. GPC curve of crude PDECL<sub>40</sub>.  $M_n=8128$ ,  $D=1.1517$

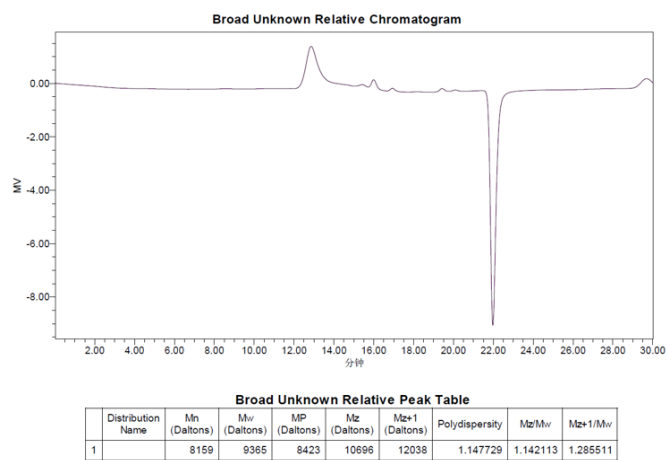

Figure S27. GPC curve of crude PVPyCL<sub>40</sub>.  $M_n=8159$ ,  $D=1.1477$





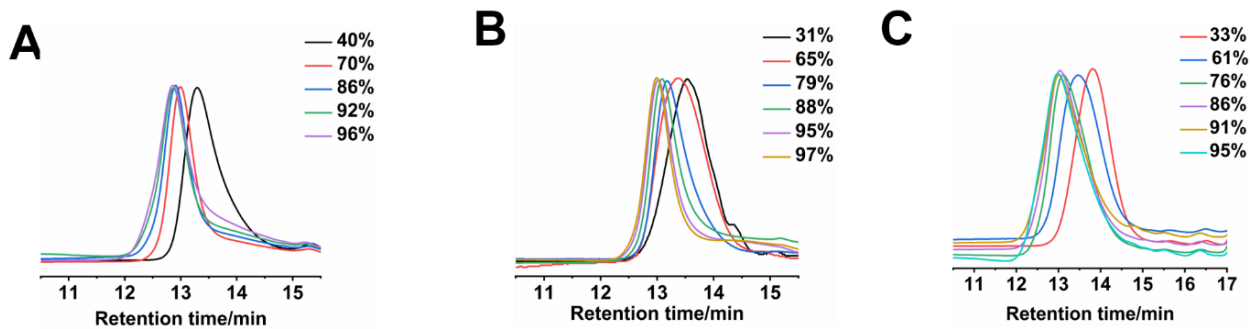

**Figure S31.** GPC curve of (A) PNICL<sub>40</sub>, (B) PDECL<sub>40</sub> and (C) PVPyCL<sub>40</sub> at different monomer conversion

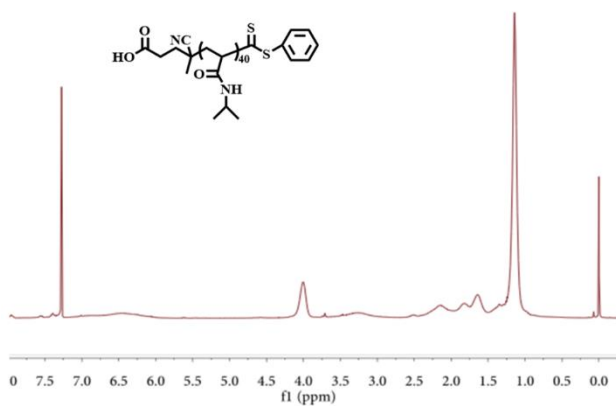

**Figure S32.** <sup>1</sup>H NMR spectrum of PNIPAM<sub>40</sub>-COOH

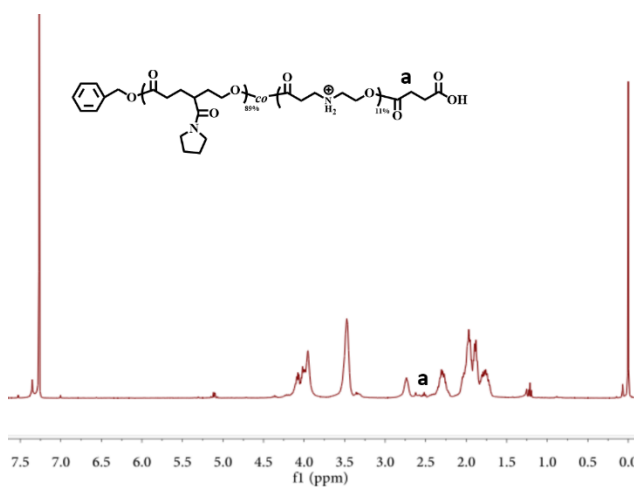

**Figure S33.** <sup>1</sup>H NMR spectrum of P(VPyCL<sub>89%</sub>-*co*-PIL<sub>89%</sub>)<sub>20</sub>-COOH

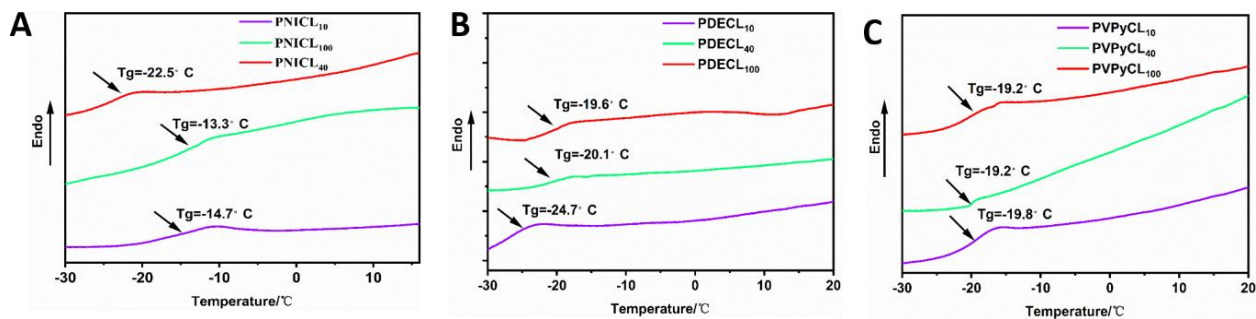

**Figure S34.** DSC of PNICL, PDECL and PVPyCL

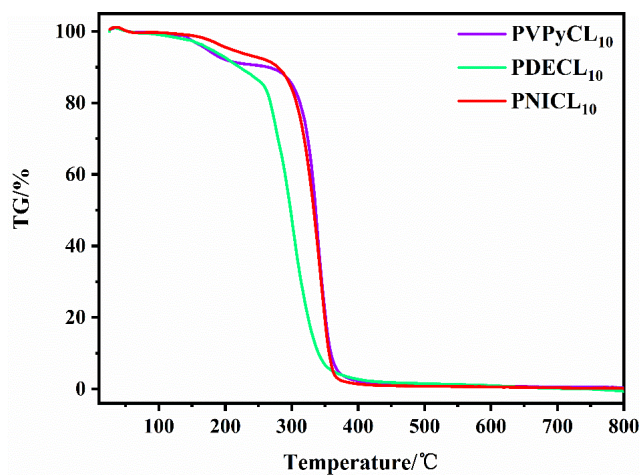

**Figure S35.** TGA of PNICL<sub>10</sub>, PDECL<sub>10</sub>, PVPyCL<sub>10</sub>

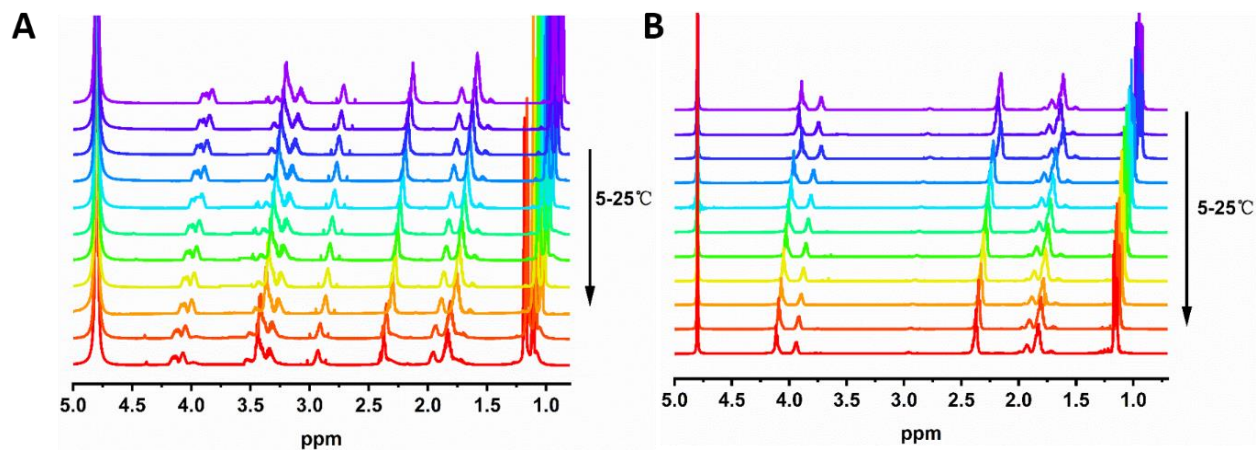

**Figure S36.** Variable temperature  $^1\text{H}$  NMR of (A) PNICL<sub>10</sub> and (B) PDECL<sub>10</sub> in  $\text{D}_2\text{O}$ , concentration=5wt%

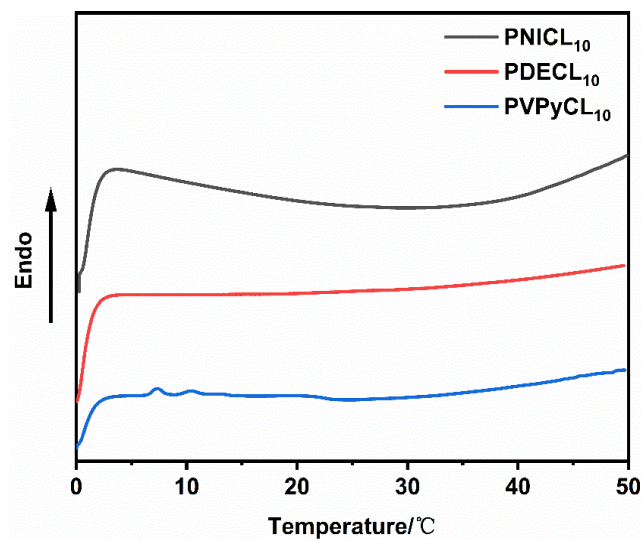

**Figure S37.** DSC of PNICL<sub>10</sub>, PDECL<sub>10</sub>, PVPyCL<sub>10</sub> in D<sub>2</sub>O, concentration=5wt%

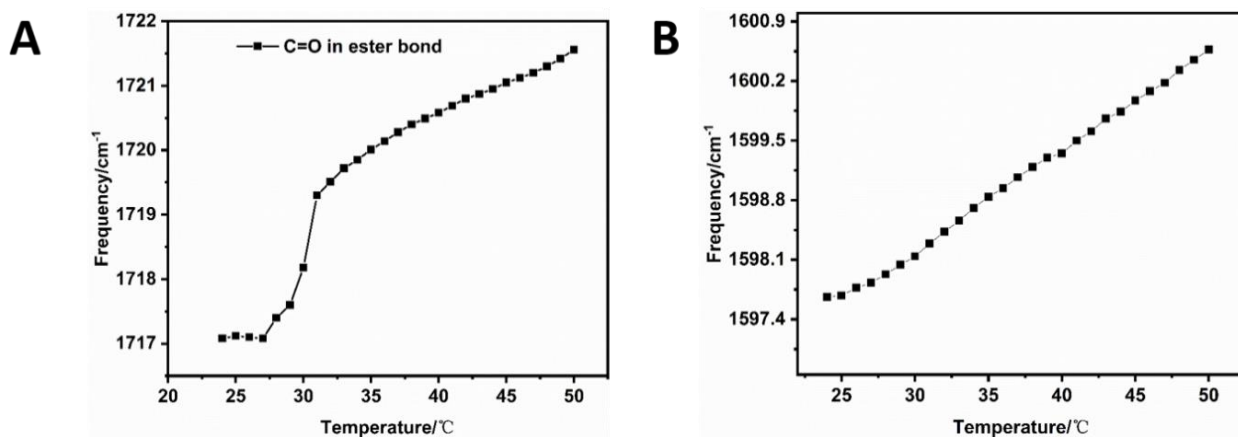

**Figure S38.** Quantitative analysis of the wavenumber changes of the  $\nu(\text{C}=\text{O})$  of (A) ester bond and (B) amide bond, with temperature, PVPyCL<sub>10</sub> in D<sub>2</sub>O, concentration=5wt%

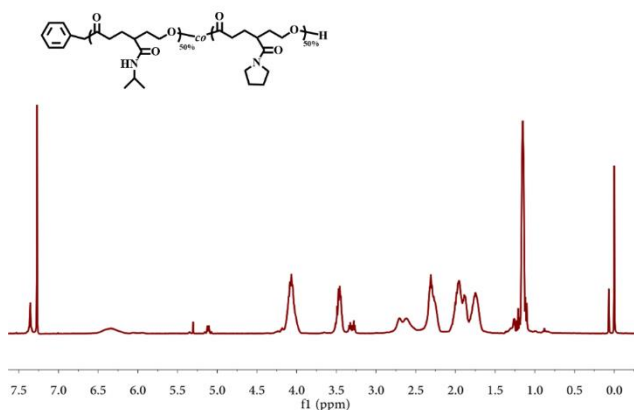

**Figure S39.**  $^1\text{H}$  NMR spectrum of  $\text{P}(\text{VPyCL}_{50\%}\text{-co-NICL}_{50\%})_{20}$

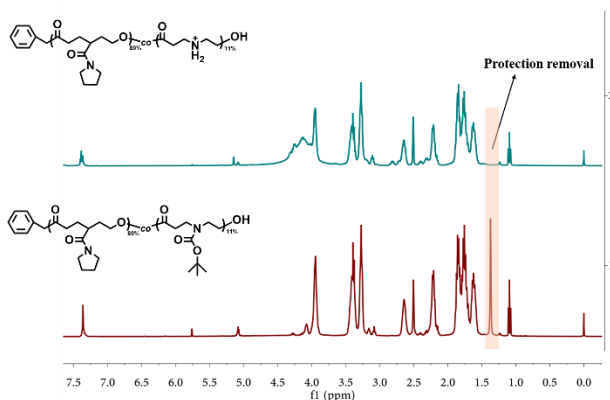

**Figure S40.**  $^1\text{H}$  NMR spectrum of  $\text{P}(\text{VPyCL}_{90\%}\text{-co-Boc-NIPIL}_{10\%})_{20}$  and deprotection product

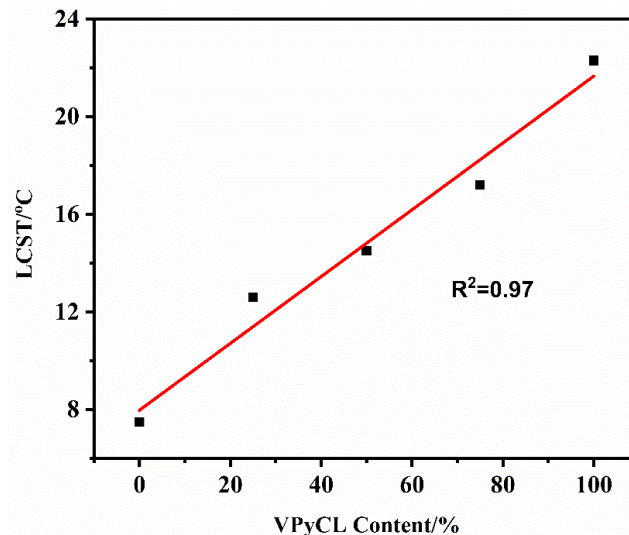

**Figure S41.** Temperature-dependent transmittance of  $\text{P}(\text{VPyCL}_x\text{-co-NICL}_{1-x})_{20}$  Solutions

### 3 The degradation experiments of poly( $\gamma$ -amide- $\epsilon$ -caprolactone)s

The degradation experiment was carried out under Lipase immobilized from *Candida Antarctica* in phosphate buffer solution (PBS, pH = 7.4) according to literature.<sup>7</sup> In brief, 500mg  $\text{P}(\text{VPyCL}_{89\%}\text{-co-PIL}_{11\%})_{20}$  was dispersed in 50ml PBS solution. 100mg native enzyme was added into solution and stirred at 37°C. In order to ensure high activities of the enzyme throughout the experiment, native enzyme was replaced in 24h. 5ml solution was taken at pre-determined time to measure LCST of degraded polymer solution. Residual polymer solution was lyophilized to measure GPC curve in DMF.

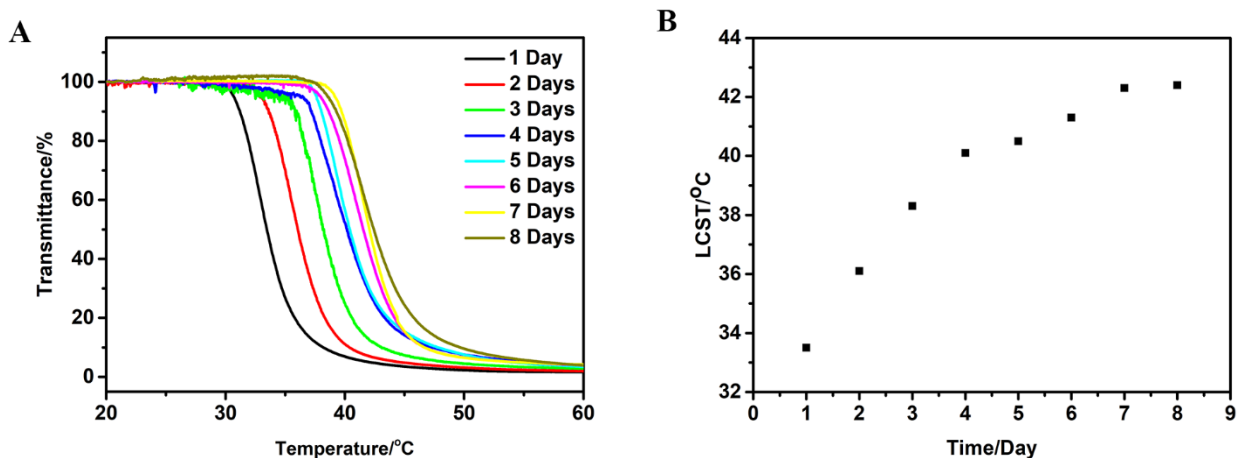

**Figure S42.** (A) Transmittance versus temperature of P(VPyCL<sub>89%</sub>-co-PIL<sub>11%</sub>)<sub>20</sub> under enzymatic conditions in different time. (B) LCST versus time of P(VPyCL<sub>89%</sub>-co-PIL<sub>11%</sub>)<sub>20</sub> under enzymatic conditions

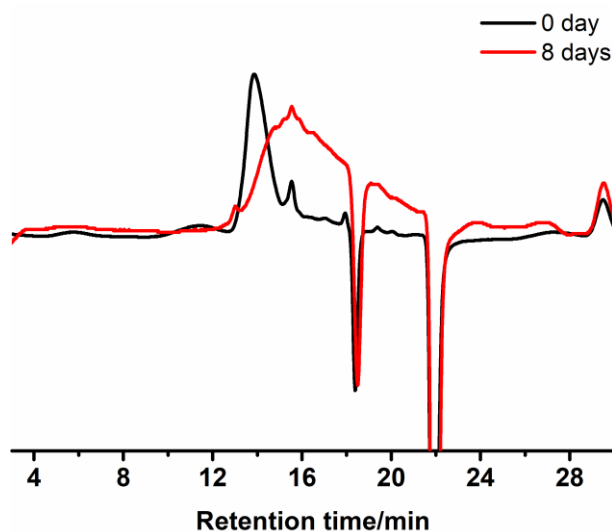

**Figure S43.** GPC curve of P(VPyCL<sub>89%</sub>-co-PIL<sub>11%</sub>)<sub>20</sub> under enzymatic conditions for 0 day and 8 days

#### 4 Cell viability experiments of poly( $\gamma$ -amide- $\epsilon$ -caprolactone)s

Cell viability of PVPyCL<sub>20</sub>, P(VPyCL<sub>89%</sub>-co-PIL<sub>11%</sub>)<sub>20</sub> as well as its degraded product (degraded product was gained after P(VPyCL<sub>89%</sub>-co-PIL<sub>11%</sub>)<sub>20</sub> degraded in enzyme solution for 8 days) was measured through MTT assay toward bone mesenchymal stem cells (MSCs). Before

cell viability experiments, all samples were dissolved in PBS solution with 10mg/ml concentration and sterilized by ultraviolet light for 30 min. Then MSCs were left to adhere and proliferate on the wells for 24 h, then incubated with a concentration range (from 0 to 1000 ug/mL) of PVPyCL<sub>20</sub>, P(VPyCL<sub>89%-co-PIL<sub>11%</sub></sub>)<sub>20</sub> as well as its degraded product. After incubation for 24h or 96h, MTT solution was added to culture for an additional 4h, and the average optical density (OD) were measured by Universal Microplate Spectrophotometer. Cell viability was calculated according to the following formula:  $Cell\ viability\ (\%) = (OD_{sample}) / (OD_{control}) \times 100\%$ . Experiments were performed in triplicate.

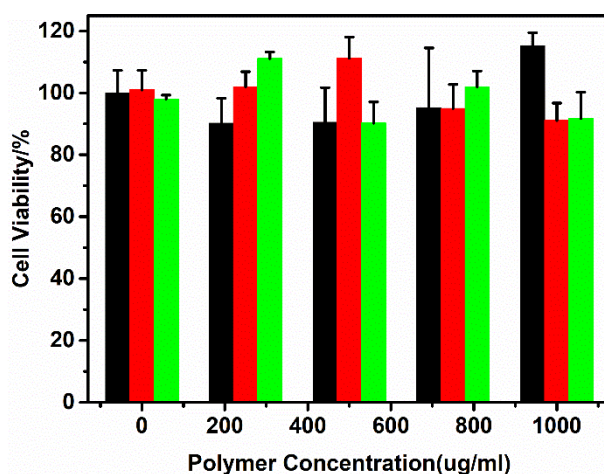

**Figure S44.** Cell viability versus polymer concentration of PVPyCL<sub>20</sub> (black line) and P(VPyCL<sub>89%-co-PIL<sub>11%</sub></sub>)<sub>20</sub> (red line) and degraded product of P(VPyCL<sub>89%-co-PIL<sub>11%</sub></sub>)<sub>20</sub> (green line) and incubation for 24h,  $n=3$

## 5 Poly( $\gamma$ -amide- $\epsilon$ -caprolactone)s/enzyme bioconjugation

### 5.1 Preparation of modified HRP

10mg HRP was mixed with 100mg P(VPyCL<sub>89%-co-PIL<sub>11%</sub></sub>)<sub>20</sub>-NHS and 100mg PNIPAM-NHS (P(VPyCL<sub>89%-co-PIL<sub>11%</sub></sub>)<sub>20</sub>-NHS and PNIPAM-NHS were prepared in section S1.8 and S1.9 ). 2ml PBS solution (PH=7.4, 10mM) was add into the flash to dissolve solid. After stirring at room temperature for 24h, reaction was terminated through dialysis ( $Mco=14000$ ) in deionized water for 24h. Purified product was collected and stored in 4°C refrigerator (HRP modified with P(VPyCL<sub>89%-co-PIL<sub>11%</sub></sub>)<sub>20</sub> was denoted as HRP-1, HRP modified with PNIPAM was denoted as HRP-2).

## 5.2 Measurement of modified degree

Modified degree of HRP was determined through trinitrobenzene sulfonic acid (TNBS) experiment. Before measuring modified degree, an important reminder was that concentration of purified product was prior to be determined through with UV-vis spectroscopy at 405nm by using a standard curve method. Concentration of modified HRP was respectively 570ug/ml and 470ug/ml. native HRP, modified HRP-1 and HRP-2 were sufficiently mixed with 20ul TNBS solution. After reacting at 40°C for 2h, absorbance of solution was measured through with UV-vis spectroscopy at 420nm. Absorbance of native HRP, modified HRP-1 and HRP-2 was denoted as  $\Delta A_{HRP}$ ,  $\Delta A_{HRP-1}$ ,  $\Delta A_{HRP-2}$ . Modified degree (E%) of HRP was determined according to the formula:  $E\% = [(\Delta A_{HRP} / C_{HRP} - \Delta A_{sample} / C_{sample}) / (\Delta A_{HRP} / C_{HRP})] * 100\%$ .

## 5.3 Measurement of enzyme activity

Enzyme activity was determined through 3,3',5,5'-tetramethylbenzidine (TMB) liquid substrate system. In detail, native HRP, modified HRP-1 and HRP-2 were placed at 50°C water bath at different time. Then, these HRP samples were taken out to be mixed with TMB solution (TMB solution was prepared through equal mixture of TMB-A solution and TMB-B solution). After reacting at room temperature for 30min, 1M H<sub>2</sub>SO<sub>4</sub> solution was added into the system to terminate reaction. Absorbance of solution was measured through with UV-vis spectroscopy at 450nm. Experiments were performed in triplicate.

## References

1. Zhao, Y.; Truhlar, D. G. The M06 suite of density functionals for main group thermochemistry, thermochemical kinetics, noncovalent interactions, excited states, and transition elements: two new functionals and systematic testing of four M06-class functionals and 12 other functionals. *Theor. Chem. Acc.* **2008**, *120*, 215-241.
2. Krishnan, R.; Binkley, J. S.; Seeger, R.; Pople, J. A. Self-consistent molecular orbital methods. XX. A basis set for correlated wave functions. *J. Chem. Phys.* **1980**, *72*, 650-654.
3. Lefebvre, C.; Rubez, G.; Khartabil, H.; Boisson, J.-C.; Contreras-Garcia, J.; Henon, E. Accurately extracting the signature of intermolecular interactions present in the NCI plot of the reduced density gradient versus electron density. *Phys. Chem. Chem. Phys.* **2017**, *19*, 17928-17936.
4. Lu, T.; Chen, F. Multiwfn: A multifunctional wavefunction analyzer. *J. Comp. Chem.* **2012**, *33*, 580-592.
5. Humphrey, W.; Dalke, A.; Schulten, K. VMD: visual molecular dynamics. *J. Mol. Graph.* **1996**, *14*, 33-38.
6. Blake, T. R.; Waymouth, R. M. Organocatalytic Ring-Opening Polymerization of Morpholinones: New Strategies to Functionalized Polyesters. *J. Am. Chem. Soc.* **2014**, *136*, 9252-9255.
7. Guillaume G. H.; Maria C. A.; Marvin L.; Jonathan T. H.; Rachel K. O.; Andrew P. D. Poly(oligo(ethylene glycol) vinyl acetate)s: A Versatile Class of Thermoresponsive and Biocompatible Polymers. *Angew. Chem. Int. Ed.* **2017**, *56*, 1–6.
